# Supplementary material for: Synthesis and Characterization of a Crystalline Imine-Based Covalent Organic Framework with Triazine Node and Biphenyl Linker and Its Fluorinated Derivate for CO2/CH4 Separation
Source: MDPI journal article supplement (doi:10.3390/ma15082807), 2022-04-11
Supplement: s1 [file s1]

*Supplementary Materials*

# **Synthesis and Characterization of a Crystalline Imine-Based Covalent Organic Framework with Triazine Node and Biphenyl Linker and Its Fluorinated Derivate for CO<sub>2</sub>/CH<sub>4</sub> Separation**

Stefanie Bügel <sup>1</sup>, Malte Hähnel <sup>1</sup>, Tom Kunde <sup>2</sup>, Nader de Sousa Amadeu <sup>3</sup>, Yangyang Sun <sup>1</sup>, Alex Spieß <sup>1</sup>, Thi Hai Yen Beglau <sup>1</sup>, Bernd M. Schmidt <sup>2,\*</sup> and Christoph Janiak <sup>1,\*</sup>

<sup>1</sup> Institut für Anorganische Chemie und Strukturchemie, Heinrich-Heine-Universität Düsseldorf, 40204 Düsseldorf, Germany; stefanie.buegel@hhu.de (S.B.); mahae107@hhu.de (M.H.); yasun100@hhu.de (Y.S.); alex.spiess@hhu.de (A.S.); beglau@hhu.de (T.H.Y.B.)

<sup>2</sup> Institut für Organische Chemie und Makromolekulare Chemie, Heinrich-Heine-Universität Düsseldorf, 40204 Düsseldorf, Germany; kunde@hhu.de

<sup>3</sup> Bundesanstalt für Materialforschung und -Prüfung, Fachbereich 6.3 (Strukturanalytik), 12489 Berlin, Germany; nader.amadeu@bam.de

\* Correspondence: bernd.schmidt@hhu.de (B.M.S.); janiak@hhu.de (C.J.)

## Table of Contents

|                                                                                               |    |
|-----------------------------------------------------------------------------------------------|----|
| 1. Synthetic procedure for 2,2',3,3',5,5',6,6'-octafluoro-4,4'-biphenyldicarboxaldehyde ..... | 3  |
| 1.1. Synthesis of 1,1'-(dicyano)-2,2',3,3',5,5',6,6'-octafluoro-4,4'-biphenyl (1) .....       | 3  |
| 1.2. Synthesis of 2,2',3,3',5,5',6,6'-octafluoro-4,4'-biphenyldicarboxaldehyde (2) .....      | 3  |
| 2. Characterization of HHU-COF-1 and HHU-COF-2 .....                                          | 7  |
| 2.1. X-ray photoelectron spectroscopy (XPS) .....                                             | 7  |
| 2.2. Scanning electron microscopy (SEM) .....                                                 | 9  |
| 2.3. Energy dispersive X-ray spectroscopy (SEM-EDX) .....                                     | 9  |
| 2.4. CO <sub>2</sub> - and CH <sub>4</sub> -sorption .....                                    | 10 |
| 2.5. Ideal adsorbed solution theory (IAST) selectivities .....                                | 12 |
| 2.6. Thermogravimetric analysis (TGA) .....                                                   | 13 |
| 2.7. Correlation of 2theta values .....                                                       | 13 |
| 2.8. Images of HHU-COF-1 and HHU-COF-2 .....                                                  | 14 |
| 3. Characterization of HHU-COF-1 (larger scale) and HHU-COF-2 (larger scale) .....            | 14 |
| 3.1. Infrared (IR) spectroscopy .....                                                         | 14 |
| 3.2. Elemental analysis .....                                                                 | 14 |
| 3.3. N <sub>2</sub> -sorption .....                                                           | 15 |
| 3.4. TGA .....                                                                                | 16 |
| 3.5. Powder X-Ray diffraction (PXRD) .....                                                    | 16 |
| 4. Preparation and characterization of MMMs .....                                             | 17 |
| 4.1. Schematic preparation of the pure polymer membrane and MMMs .....                        | 17 |
| 4.2. Casting procedure .....                                                                  | 17 |
| 4.3. Set-up for CO <sub>2</sub> /CH <sub>4</sub> mixed gas separation measurements .....      | 18 |
| 4.4. Membrane thickness .....                                                                 | 18 |
| 4.5. SEM images of membrane surfaces .....                                                    | 19 |
| 4.6. SEM-EDX of HHU-COF-2/Matrimid MMMs .....                                                 | 19 |
| 4.7. Tensile strength .....                                                                   | 20 |
| 4.8. Long-term stability of MMMs .....                                                        | 20 |
| 4.9. Comparison of membrane performance .....                                                 | 21 |
| 5. Synthesis and characterization of TRITER-1 (= SCF-HCOF-1) and SCF-FCOF-1 .....             | 22 |
| 5.1. Materials and Synthesis .....                                                            | 22 |
| 5.2. IR spectroscopy .....                                                                    | 24 |
| 5.3. Elemental analysis .....                                                                 | 24 |
| 5.4. SEM-EDX .....                                                                            | 24 |
| 5.5. N <sub>2</sub> -sorption .....                                                           | 25 |

|                                              |    |
|----------------------------------------------|----|
| 5.6. TGA.....                                | 26 |
| 5.7. PXRD .....                              | 26 |
| 5.8. Images of TRITER-1 and SCF-FCOF-1 ..... | 27 |
| 6. References.....                           | 28 |

## 1. Synthetic procedure for 2,2',3,3',5,5',6,6'-octafluoro-4,4'-biphenyldicarboxaldehyde

### 1.1. Synthesis of 1,1'-(dicyano)-2,2',3,3',5,5',6,6'-octafluoro-4,4'-biphenyl (1)

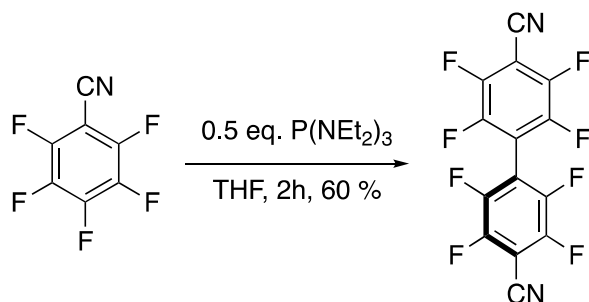

Pentafluorobenzonitrile (8.10 mL, 12.30 g, 64 mmol) was dissolved in 200 mL of dry THF and Tris(diethyl-amino)phosphine (8.16 g, 0.52 eq.) were added dropwise under nitrogen and stirring. The mixture was allowed to stir for 2 hours at room temperature. After the TLC indicated the complete consumption of the starting material, the reaction was quenched *via* the addition of 40 mL 2N hydrochloric acid. The mixture was extracted with diethyl ether (3 x 50 mL) and was dried over anhydrous magnesium sulphate. After evaporation of the solvent the oily residue was left to crystallize to yield faint yellow crystalline blocks. yield: 6.68 g; 19 mmol; 60%

The analytical data was in accordance with the literature [1].

$^{19}\text{F}$  NMR(282 MHz,  $\text{CDCl}_3$ ):  $\delta$  -129.65 (d, Ar- $\text{F}_A$ ), -133.47 (d, Ar- $\text{F}_B$ )

### 1.2. Synthesis of 2,2',3,3',5,5',6,6'-octafluoro-4,4'-biphenyldicarboxaldehyde (2)

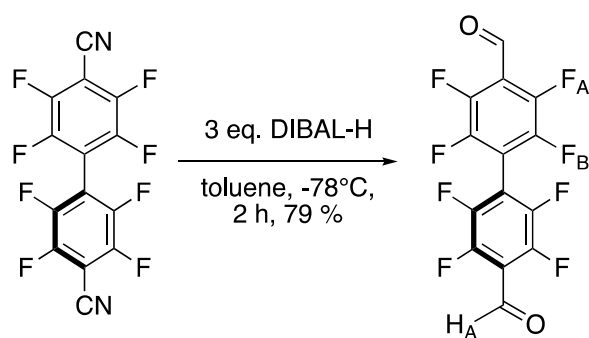

1,1'-(Dicyano)-2,2',3,3',5,5',6,6'-octafluoro-4,4'-biphenyl (2.00 g, 5.74 mmol) was dissolved in toluene (50 mL) and the resulting solution was thoroughly degassed *via* purging with argon for 15 minutes. A solution of diisobutylaluminium hydride (DIBAL-H) in toluene (1.5 M, 11.5 mL, 17.22 mmol) was added dropwise over a period of 30 minutes at  $-78^\circ\text{C}$ . After complete addition, the resulting mixture was stirred for additional 2 hours. The reaction was quenched by addition of 10 mL of ethyl acetate and 30 mL of 2N hydrochloric acid. The organic phase was separated and the aqueous phase was extracted with dichloromethane (2 x 100 mL).

The combined organic phases were dried over magnesium sulphate and the solvent was evaporated under reduced pressure to yield **2** as a colorless powder. yield: 1.6 g; 4.51 mmol; 79%

**<sup>1</sup>H NMR**(300 MHz, CDCl<sub>3</sub>): δ 10.39 (s, -CH<sub>A</sub>O); **<sup>19</sup>F NMR**(282 MHz, CDCl<sub>3</sub>): δ -136.15 (m, Ar-F<sub>A</sub>), -143.70 (m, Ar-F<sub>B</sub>); **<sup>13</sup>C{<sup>1</sup>H}** NMR (75 MHz, CDCl<sub>3</sub>) δ 181.90 (s, Ar-CH<sub>A</sub>O), 147.24 (d, *J* = 210.5 Hz, C<sub>Ar</sub>-F<sub>A</sub>), 143.76 (d, *J* = 207.0 Hz, C<sub>Ar</sub>-F<sub>B</sub>), 117.05 (t, *J* = 9.8 Hz, C<sub>Ar</sub>-CH<sub>A</sub>O), 111.89 (m, C<sub>4</sub>/C<sub>4'</sub>); **FT-IR (ATR)**:  $\tilde{\nu}$ (cm<sup>-1</sup>) = 2910.6 (w), 2358.9 (w), 2339.7 (w), 1712.8 (s), 1651.1 (m), 1575.8 (w), 1473.6 (s), 1408.0 (m), 1381.0 (m), 1357.9 (w), 1317.4 (w), 1298.1 (m), 1276.9 (s), 1114.9 (w), 1018.4 (s), 1003.0 (s), 989.5 (s), 956.7 (s), 914.3 (m), 800.5 (m), 721.4 (s); **EI-MS (80 °C)**: calc. for [C<sub>14</sub>H<sub>2</sub>F<sub>8</sub>O<sub>2</sub>-H]<sup>+</sup> = 352.9843 m/z; found: 353.0 m/z (100%, [M-H]<sup>+</sup>), 324.9 (27%, [M-CHO]<sup>+</sup>), 297.0 m/z (26%, [M-2(CHO)+H]<sup>+</sup>), 278.0 m/z (48%, [M(297 m/z)-F]<sup>+</sup>); **M<sub>p</sub>**: 144.8-145.1 °C.

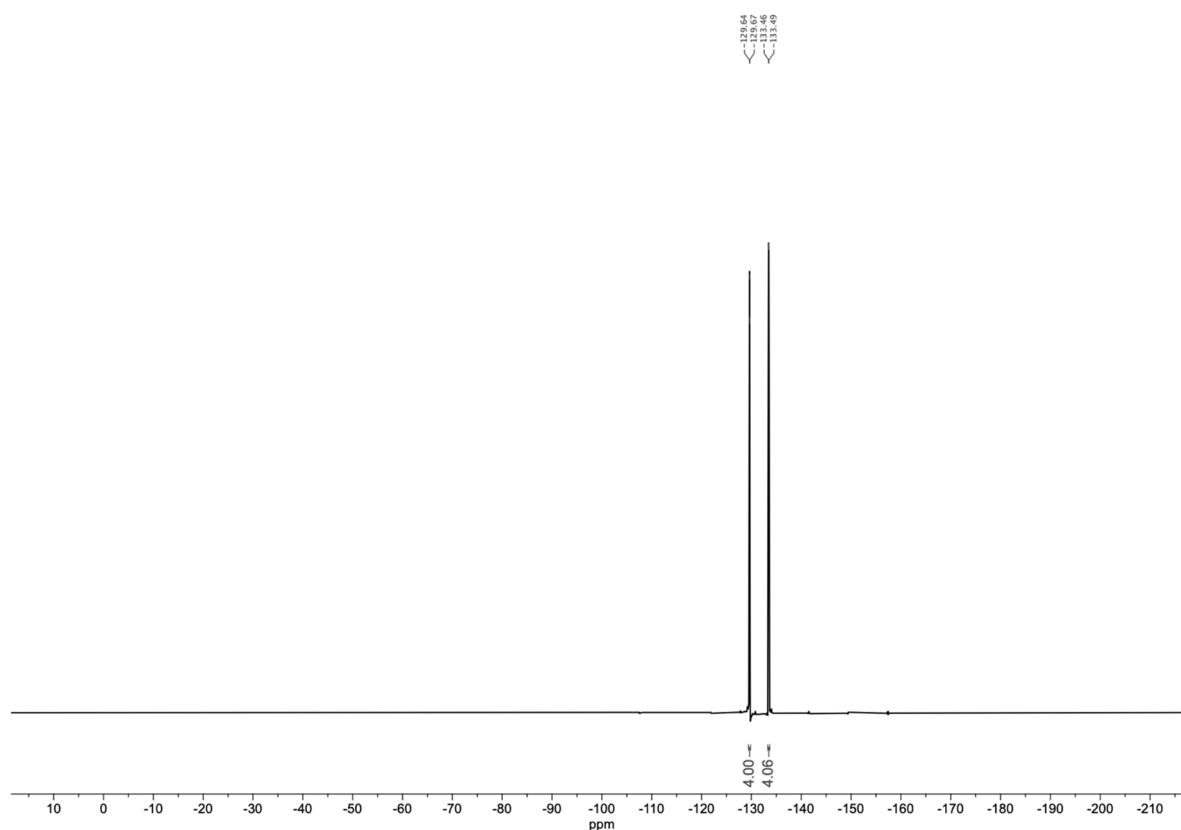

**Figure S1.** <sup>19</sup>F NMR spectrum of perfluorinated nitrile **1**.

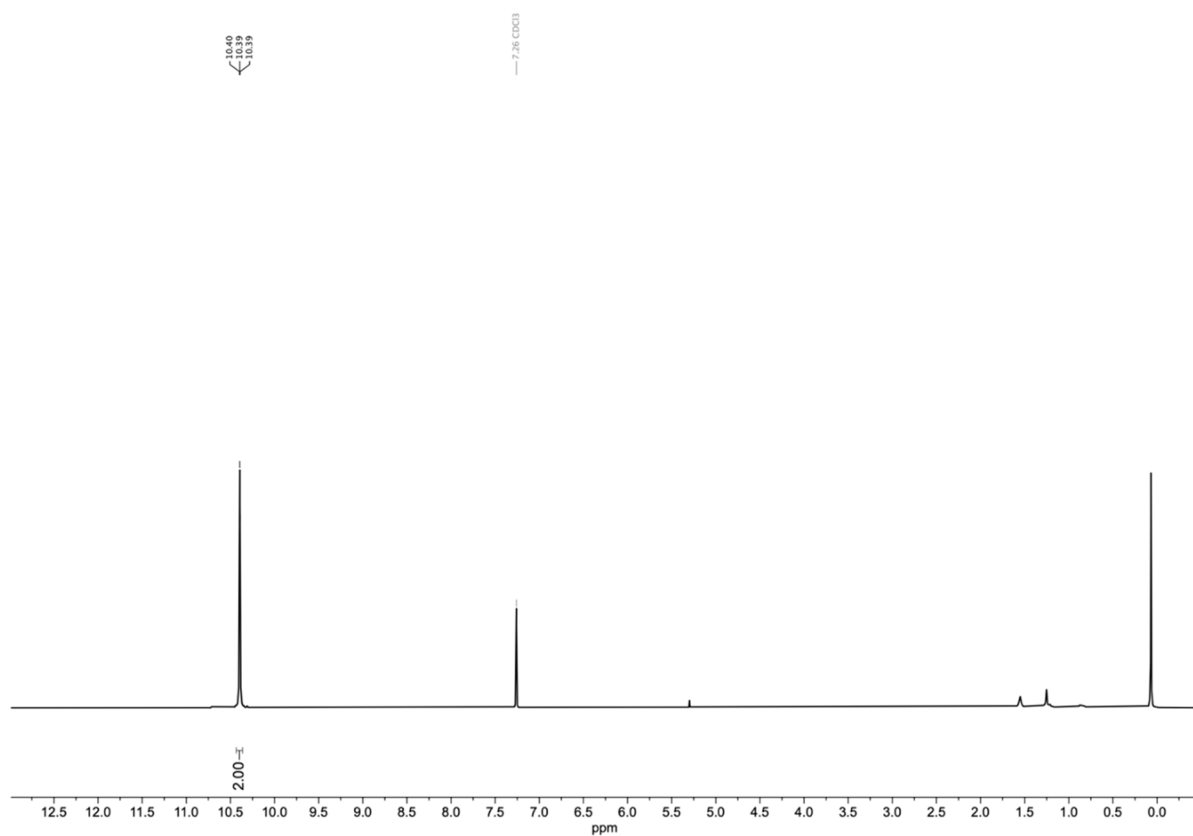

**Figure S2.**  $^1\text{H}$  NMR spectrum of perfluorinated aldehyde **2**.

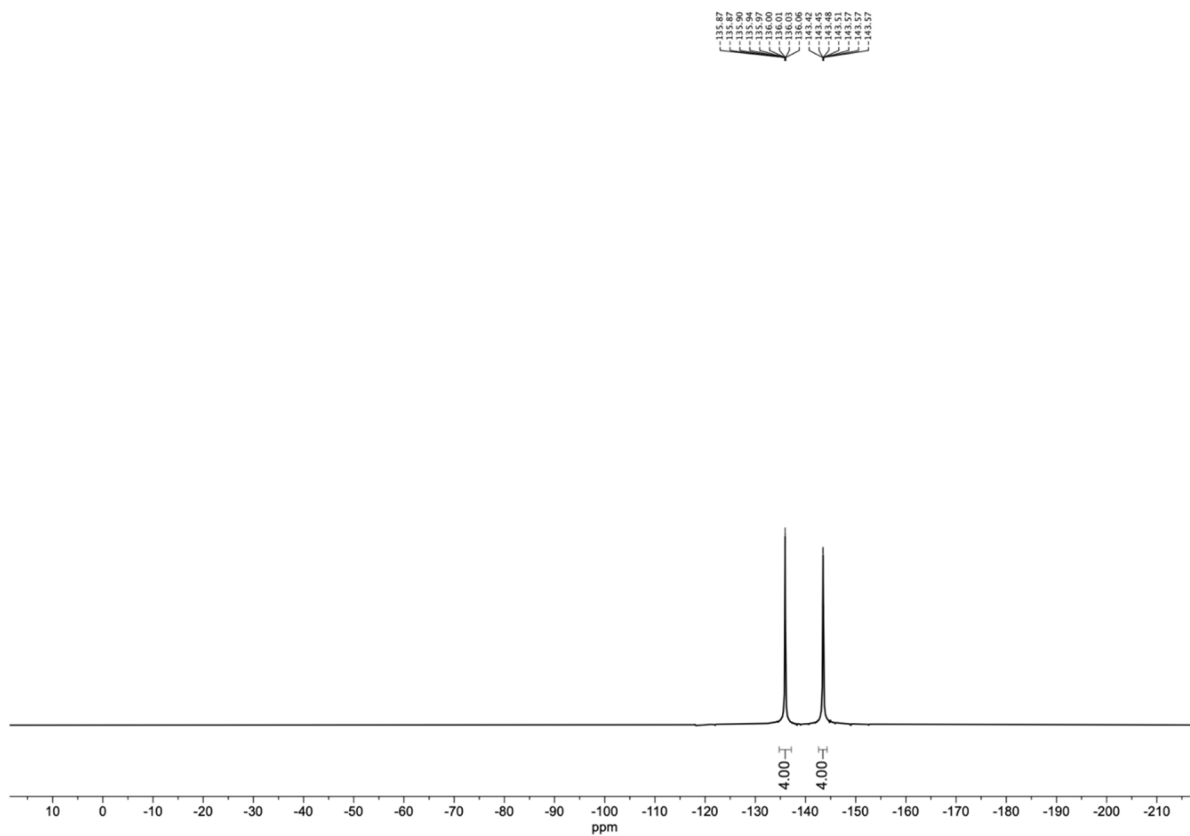

**Figure S3.**  $^{19}\text{F}$  NMR spectrum of perfluorinated aldehyde **2**.

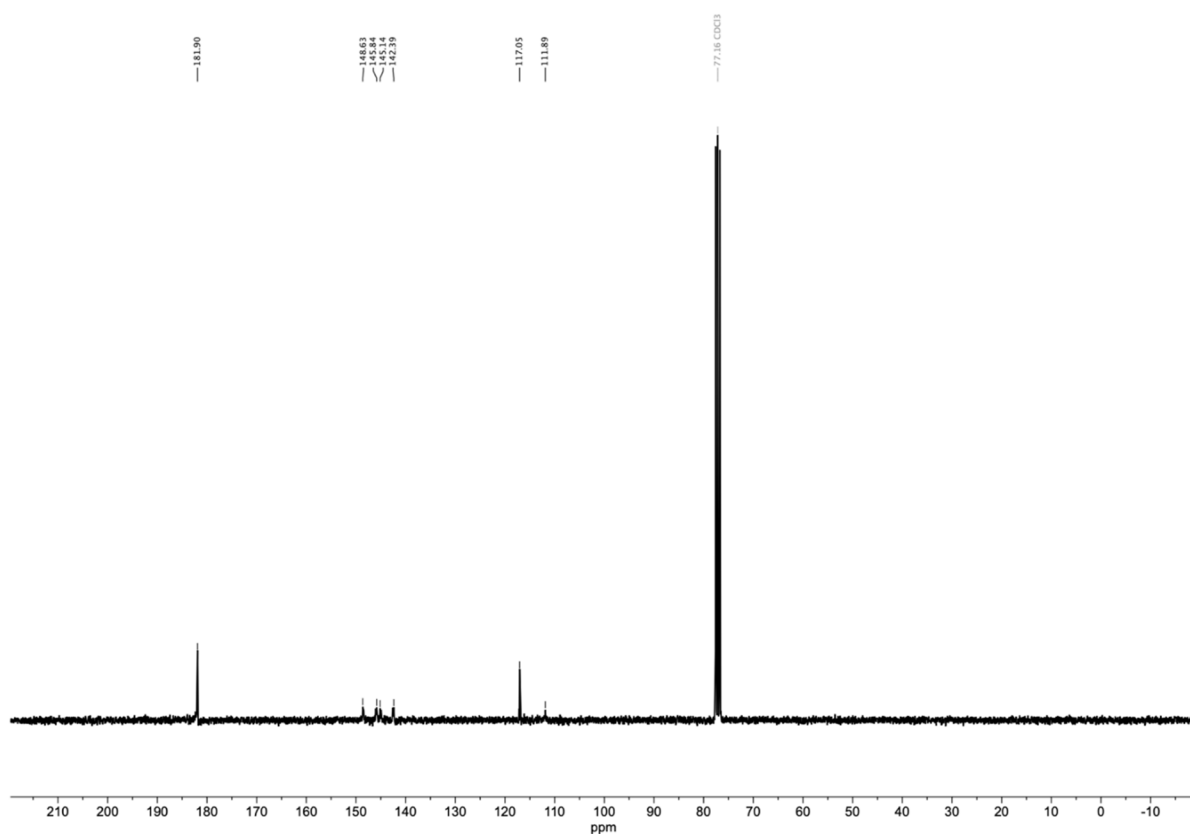

**Figure S4.**  $^{13}\text{C}\{^1\text{H}\}$  NMR spectrum of perfluorinated aldehyde **2**.

T: + c EI [ 45.00-900.03]

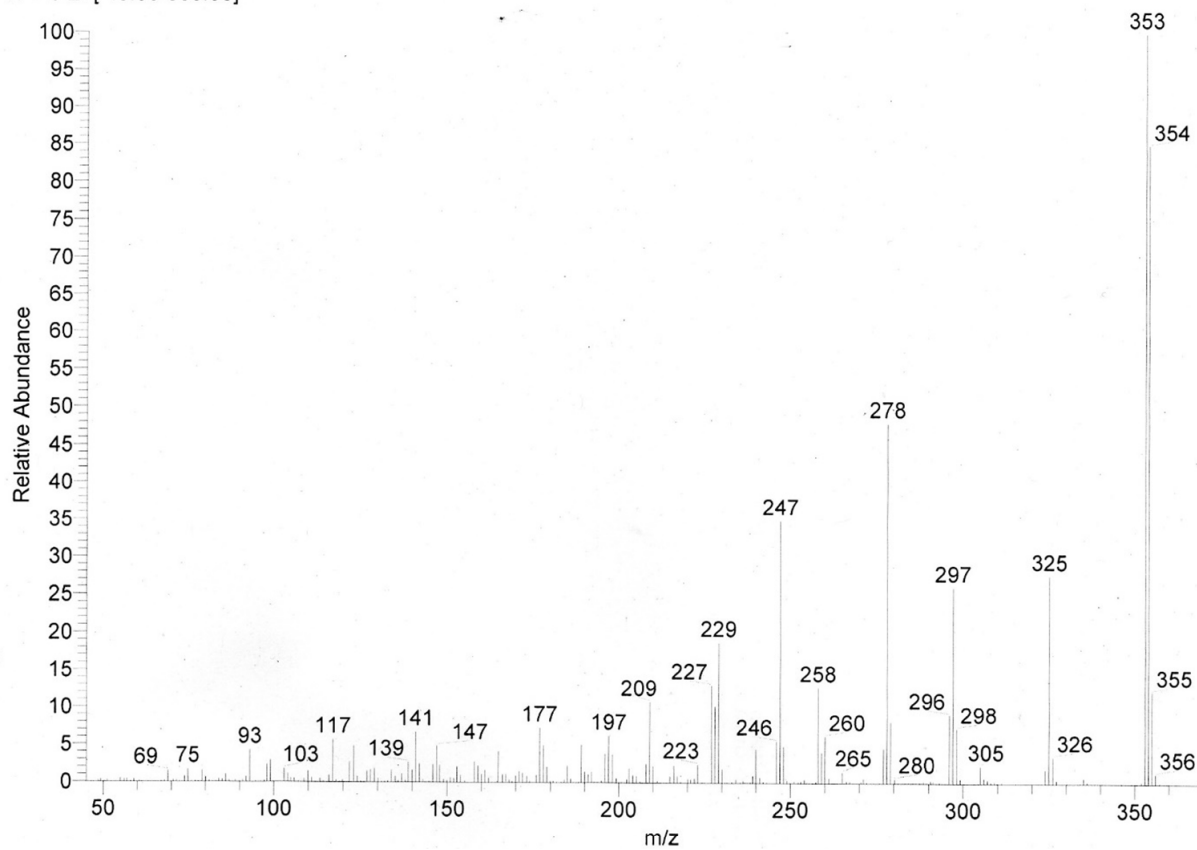

**Figure S5.** EI-MS (at 80 °C) spectrum of perfluorinated aldehyde **2**.

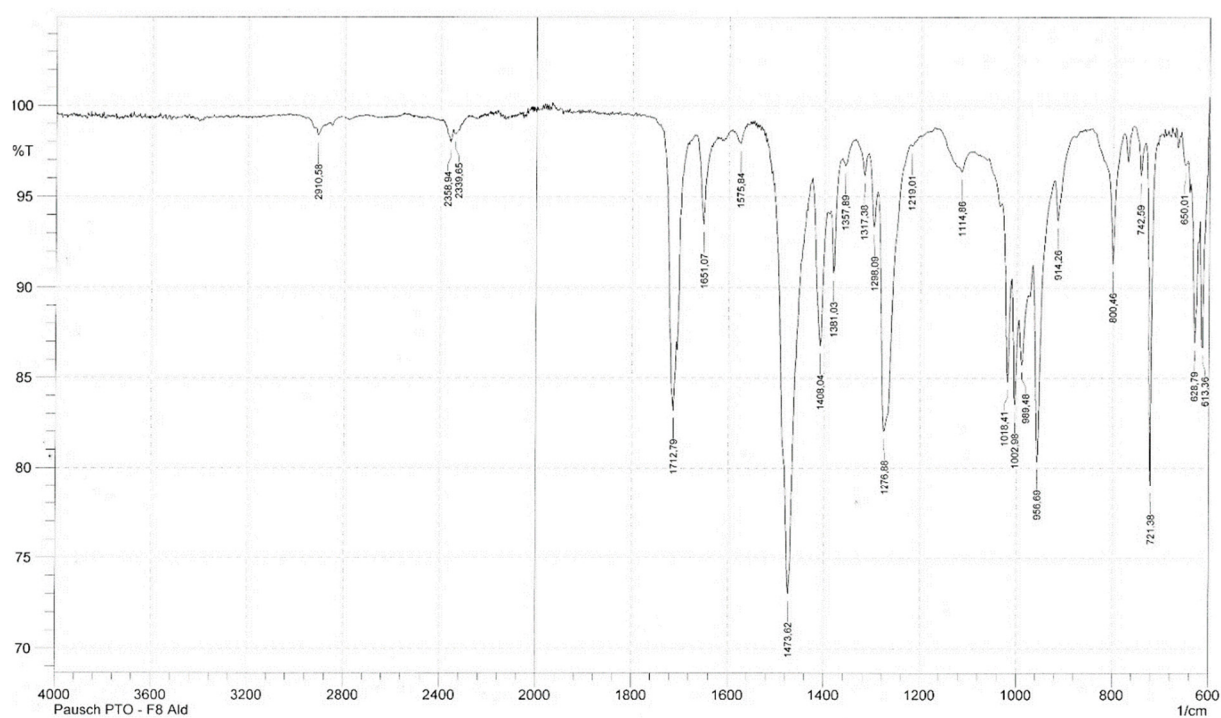

**Figure S6.** AT-IR spectrum of perfluorinated aldehyde **2**.

## 2. Characterization of HHU-COF-1 and HHU-COF-2

### 2.1. X-ray photoelectron spectroscopy (XPS)

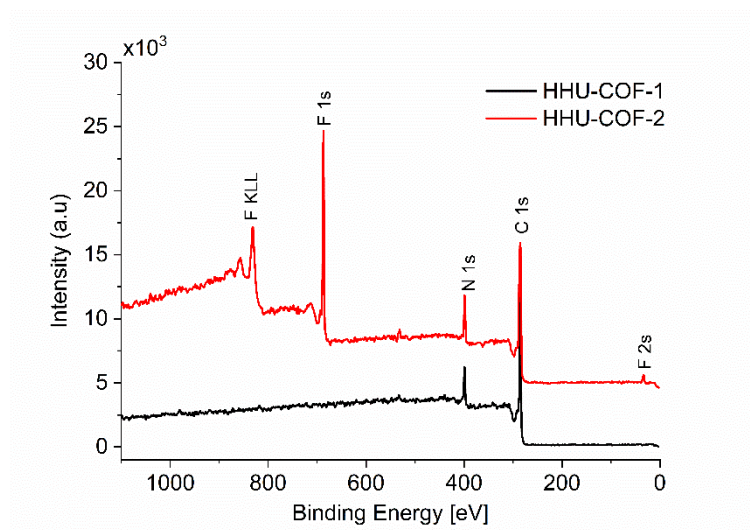

**Figure S7.** XPS survey spectra of HHU-COF-1 and HHU-COF-2.



**Table S1.** at% and wt% of the elements in HHU-COF-1 and HHU-COF-2 obtained from XPS survey spectra.

| COF       | C 1s  |       | N 1s  |       | F 1s  |       |
|-----------|-------|-------|-------|-------|-------|-------|
|           | [at%] | [wt%] | [at%] | [wt%] | [at%] | [wt%] |
| HHU-COF-1 | 89.2  | 87.6  | 10.9  | 12.4  | -     | -     |
| HHU-COF-2 | 70.8  | 62.7  | 9.8   | 10.1  | 19.5  | 27.3  |

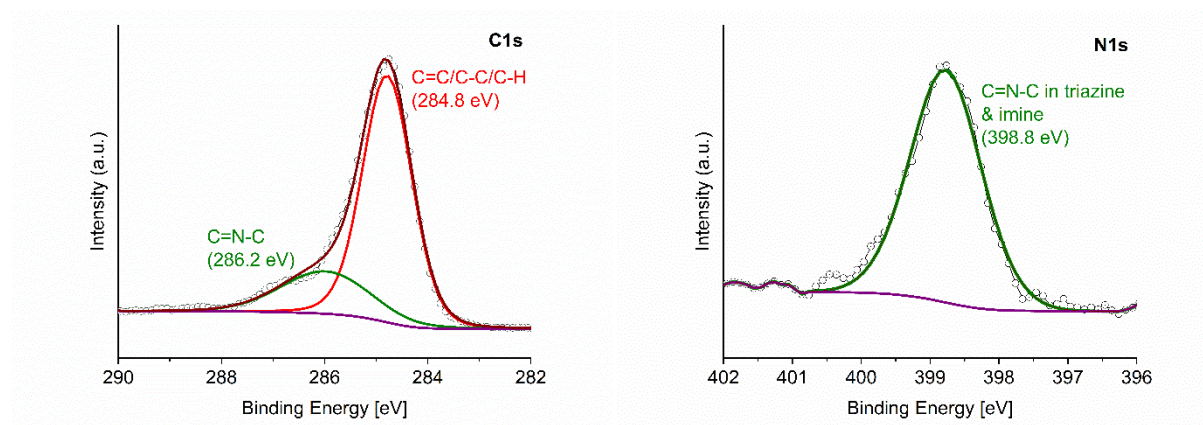

**Figure S8.** High-resolution XPS spectra of the C1s region (left) and N1s region (right) of HHU-COF-1.

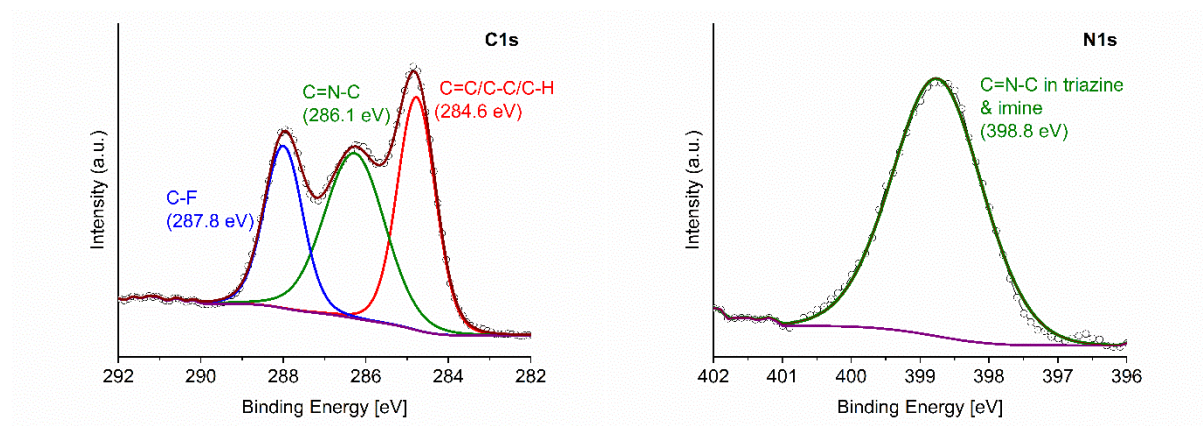

**Figure S9.** High-resolution XPS spectra of the C1s region (left) and N1s region (right) of HHU-COF-2.

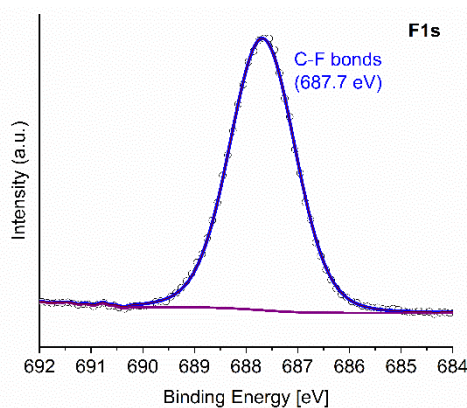

**Figure S10.** High-resolution XPS spectra of the F1s region of HHU-COF-2.

## 2.2. Scanning electron microscopy (SEM)

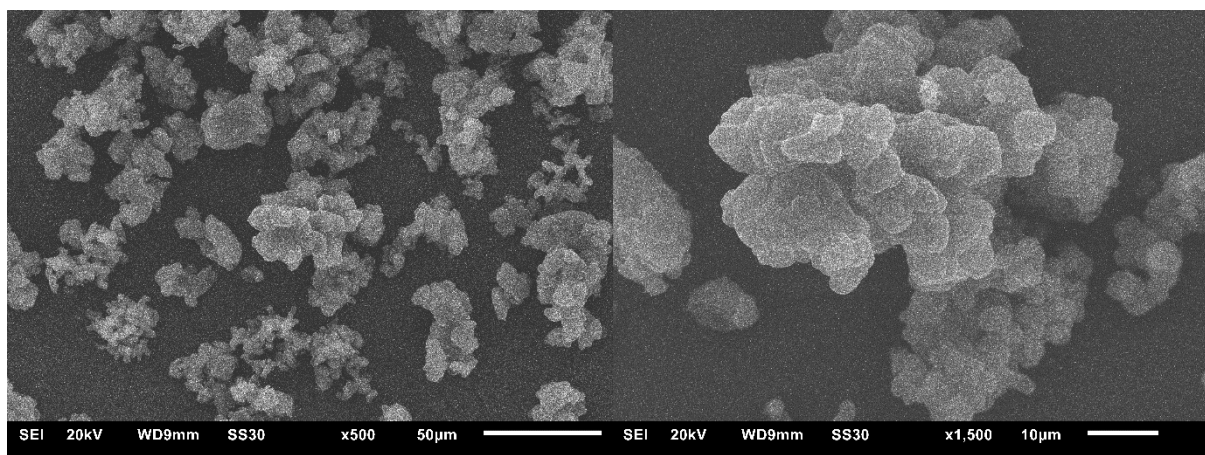

**Figure S11.** SEM images of HHU-COF-1.

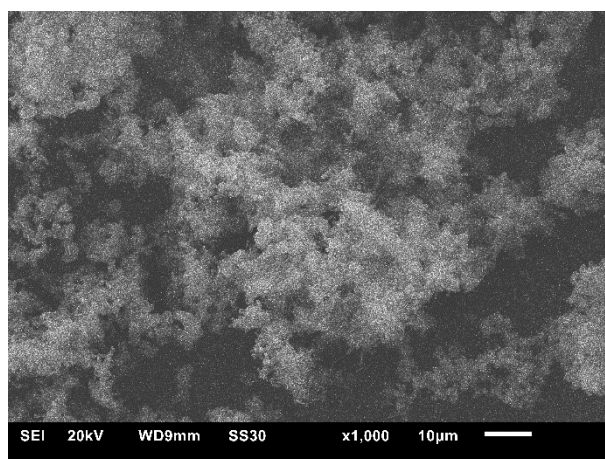

**Figure S12.** SEM image of HHU-COF-2.

## 2.3. Energy dispersive X-ray spectroscopy (SEM-EDX)

**Table S2.** EDX analysis of HHU-COF-2.

|                                   | C     | H    | F     | N     | O   | Au  | Cu  | Zn  | Sum   |
|-----------------------------------|-------|------|-------|-------|-----|-----|-----|-----|-------|
| Ideal [wt%]                       | 60.66 | 1.82 | 27.41 | 10.11 | -   | -   | -   | -   | 100.0 |
| EDX [wt%] <sup>a</sup>            | 63.1  | -    | 16.3  | 7.3   | 3.5 | 7.7 | 1.2 | 0.9 | 100.0 |
| EDX [wt%] with C,F,N              | 63.1  | -    | 16.3  | 7.3   | -   | -   | -   | -   | 86.7  |
| EDX [wt%] <sup>a</sup> with C,F,N | 72.8  | -    | 18.8  | 8.4   | -   | -   | -   | -   | 100.0 |

<sup>a</sup> normalized

## 2.4. CO<sub>2</sub>- and CH<sub>4</sub>-sorption

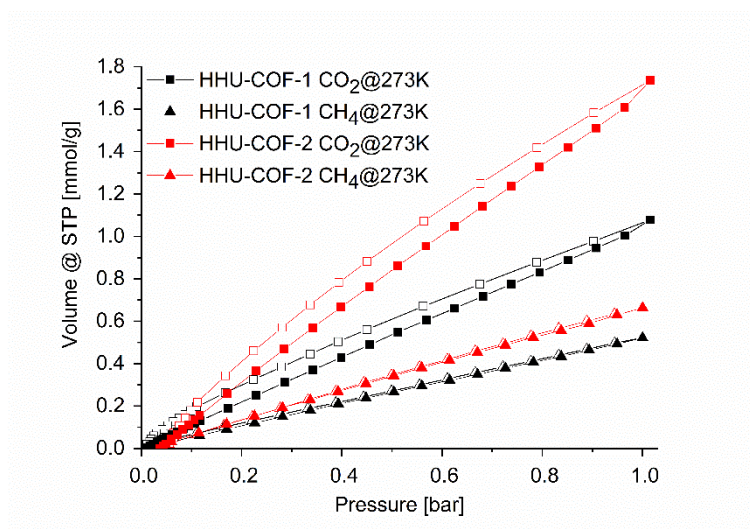

**Figure S13.** CO<sub>2</sub> and CH<sub>4</sub> sorption isotherms at 273 K of HHU-COF-1 and HHU-COF-2, respectively.

**Table S3.** Comparison of CO<sub>2</sub> uptake and BET surface area of imine-linked/azine COFs.

| Material                                                               | CO <sub>2</sub> uptake,<br>1 bar, 273 K          | BET surface area,<br>N <sub>2</sub> at 77 K [m <sup>2</sup> /g] | Reference    |
|------------------------------------------------------------------------|--------------------------------------------------|-----------------------------------------------------------------|--------------|
| HHU-COF-1                                                              | 1.08 mmol/g                                      | 2352                                                            | This<br>work |
| HHU-COF-2                                                              | 1.74 mmol/g                                      | 1356                                                            |              |
| RT-COF-1 <sup>a</sup>                                                  | 44 cm <sup>3</sup> /g (1.96 mmol/g) <sup>*</sup> | 329                                                             | [2]          |
| [HO] <sub>25%</sub> -H <sub>2</sub> P-COF <sup>b</sup>                 | 54 mg/g (1.23 mmol/g)                            | 1054                                                            | [3]          |
| [HO] <sub>100%</sub> -H <sub>2</sub> P-COF <sup>b</sup>                | 63 mg/g (1.43 mmol/g)                            | 1284                                                            |              |
| [HO <sub>2</sub> C] <sub>50%</sub> -H <sub>2</sub> P-COF <sup>c</sup>  | 96 mg/g (2.18 mmol/g)                            | 786                                                             |              |
| [HO <sub>2</sub> C] <sub>100%</sub> -H <sub>2</sub> P-COF <sup>c</sup> | 174 mg/g (3.95 mmol/g)                           | 364                                                             |              |
| DhaTph <sup>d</sup>                                                    | 65 cm <sup>3</sup> /g (2.90 mmol/g)              | 1305                                                            | [4]          |
| DmaTph <sup>e</sup>                                                    | 37 cm <sup>3</sup> /g (1.65 mmol/g)              | 431                                                             |              |
| TAPB-TFPB <sup>f</sup>                                                 | 40.1 mg/g (0.91 mmol/g)                          | 229                                                             | [5]          |
| iPrTAPB-TFPB <sup>g</sup>                                              | 31.2 mg/g (0.71 mmol/g)                          | 391                                                             |              |
| TAPB-TFP <sup>h</sup>                                                  | 180 mg/g (4.09 mmol/g)                           | 567                                                             |              |
| iPrTAPB-TFP <sup>i</sup>                                               | 105.2 mg/g (2.39 mmol/g)                         | 756                                                             |              |
| TpPa-1 <sup>j</sup>                                                    | 78 cm <sup>3</sup> /g (3.48 mmol/g)              | 535                                                             | [6]          |
| TpPa-2 <sup>k</sup>                                                    | 64 cm <sup>3</sup> /g (2.86 mmol/g)              | 339                                                             |              |

<sup>\*</sup> data obtained from graph; <sup>a</sup> synthesized from 1,3,5-tris(4-aminophenyl)benzene (TAPB) and 1,3,5-benzenetricarbaldehyde (BTCA); <sup>b</sup> imine-linked 2D COF with porphyrin scaffold and phenol units on the pore walls; <sup>c</sup> based on [HO]<sub>100%</sub>-H<sub>2</sub>P-COF with additional open carboxylic acid groups; <sup>d</sup> COF synthesized by reaction of 2,5-dihydroxyterephthalaldehyde (Dha) with 5,10,15,20-tetrakis(4-aminophenyl)-21*H*,23*H*-porphine (Tph); <sup>e</sup> COF synthesized by reaction of 2,5-dimethoxyterephthalaldehyde (Dma) with 5,10,15,20-tetrakis(4-aminophenyl)-21*H*,23*H*-porphine (Tph); <sup>f</sup> COF synthesized by reaction of 1,3,5-tris(4'-aminophenyl)benzene (TAPB) with 1,3,5-tris(4'-formylphenyl)benzene (TFPB); <sup>g</sup> COF synthesized by reaction of 1,3,5-tris(4'-amino-3',5'-isopropylphenyl)benzene (*i*PrTAPB) with 1,3,5-tris(4'-formylphenyl)benzene (TFPB); <sup>h</sup> COF synthesized by reaction of 1,3,5-tris(4'-aminophenyl)benzene (TAPB) with 1,3,5-triformylphloroglucinol (TFP); <sup>i</sup> COF synthesized by reaction of 1,3,5-tris(4'-amino-3',5'-isopropylphenyl)benzene (*i*PrTAPB) with 1,3,5-triformylphloroglucinol (TFP); <sup>j</sup> COF synthesized by reaction of 1,3,5-triformylphloroglucinol (Tp) with *p*-phenylenediamine (Pa-1); <sup>k</sup> COF synthesized by reaction of 1,3,5-triformylphloroglucinol (Tp) 2,5-dimethyl-*p*-phenylenediamine (Pa-2)

## 2.5. Ideal adsorbed solution theory (IAST) selectivities

The CO<sub>2</sub> and CH<sub>4</sub> isotherms of HHU-COF-1 were fitted with the Langmuir (LAI) isotherm model and the isotherms of HHU-COF-2 were fitted with the Toth model.

**Table S4.** Parameters for LAI and Toth fitting.

| Gas             | Temperature<br>[K] | Model | R <sup>2</sup> | Affinity constant $K$<br>[1/bar] | Maximal loading $q_{\max}$<br>[mmol/g] | Heterogeneity exponent $t$ |
|-----------------|--------------------|-------|----------------|----------------------------------|----------------------------------------|----------------------------|
| HHU-COF-1       |                    |       |                |                                  |                                        |                            |
| CO <sub>2</sub> | 273                | LAI   | 0.9999         | 0.070                            | 15.870                                 | -                          |
| CH <sub>4</sub> | 273                | LAI   | 0.9999         | 0.393                            | 16.221                                 | -                          |
| HHU-COF-2       |                    |       |                |                                  |                                        |                            |
| CO <sub>2</sub> | 273                | Toth  | 0.9962         | 0.501                            | 3.343                                  | 7.762                      |
| CH <sub>4</sub> | 273                | Toth  | 0.9996         | 0.440                            | 1.551                                  | 2.273                      |

The CO<sub>2</sub>/CH<sub>4</sub> selectivities for a binary (50:50; v:v) mixture of the gases were calculated by applying the ideal adsorbed solution theory (IAST). **Figure S14** shows the IAST selectivities as a function of the pressure.

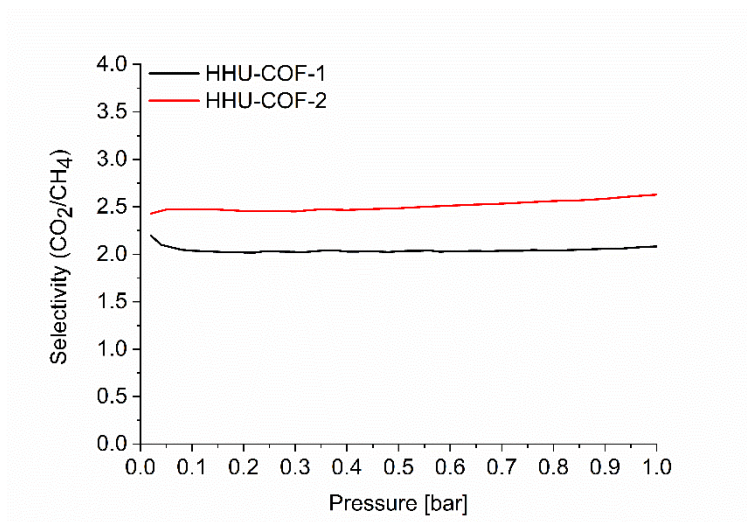

**Figure S14.** IAST selectivities of HHU-COF-1 and HHU-COF-2 for a binary (50:50; v:v) mixture of the gases CO<sub>2</sub>/CH<sub>4</sub> at 273 K.



## 2.6. Thermogravimetric analysis (TGA)

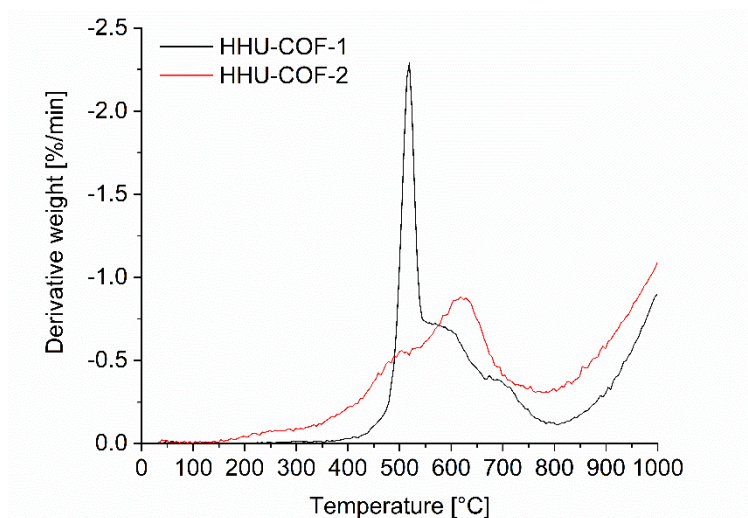

**Figure S15.** First derivative of TGA curves of HHU-COF-1 and HHU-COF-2. Measurement under nitrogen atmosphere with a heating rate of 5 K/min.

## 2.7. Correlation of 2theta values

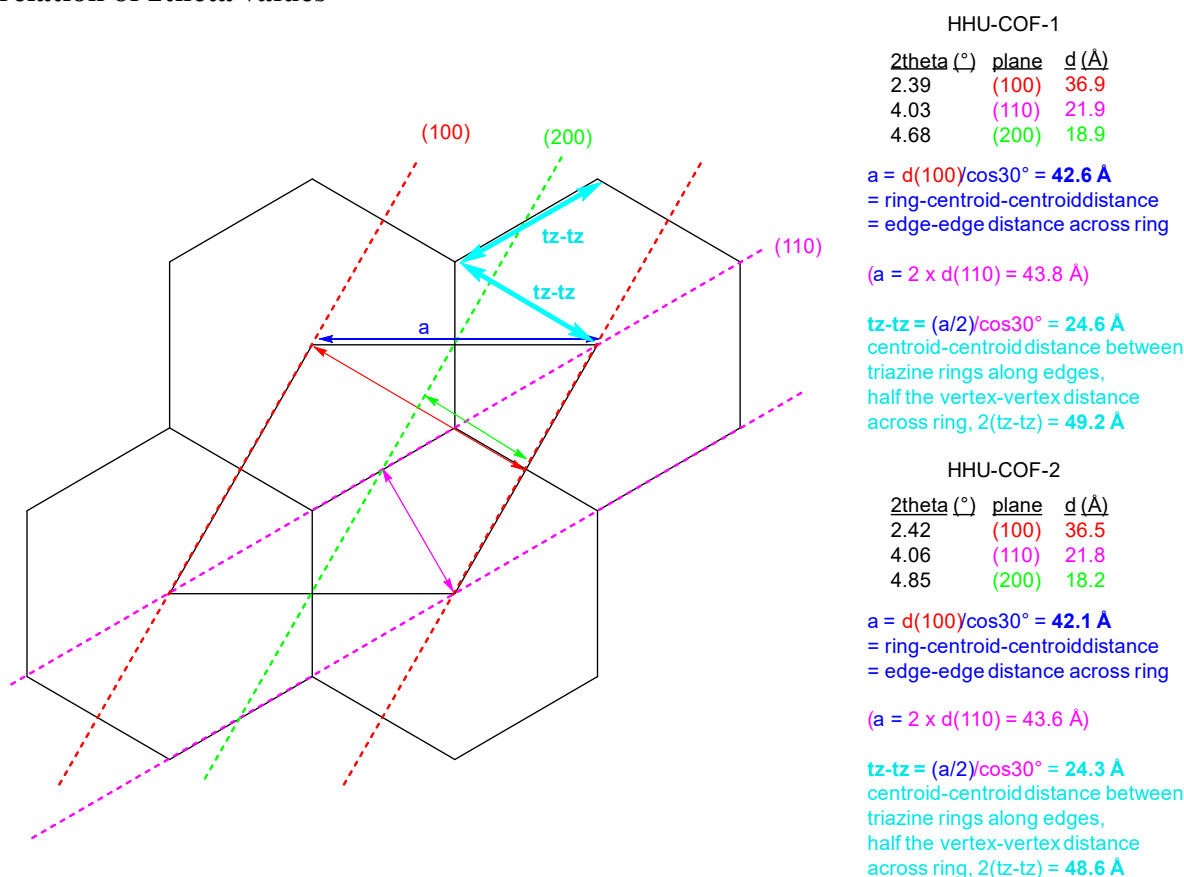

**Figure S16.** Correlation of the 2theta (2θ) values from the powder X-ray diffractograms in Figure 5 in the main text with the reflection planes and the d spacing according to the Bragg equation  $n\lambda = 2d \sin\theta$  or  $d = n\lambda / (2 \sin\theta)$  with  $\lambda = 1.5406 \text{ Å}$  and  $n = 1$ . Note that the edge-edge distances  $a$  and the triazine-centroid triazine-centroid ( $tz-tz$ ) distances along the edge derived therefrom as  $(a/2)/\cos 30^\circ$  were determined from the most intense and, thus, most accurately measurable (100) reflexes in the powder-X-ray diffractograms of HHU-COF-1 and -2.

## 2.8. Images of HHU-COF-1 and HHU-COF-2

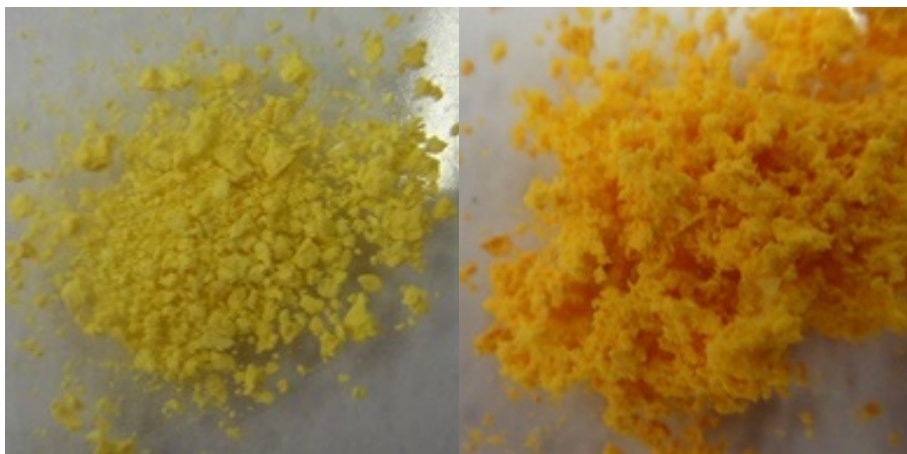

**Figure S17.** Images of HHU-COF-1 (left) and HHU-COF-2 (right).

## 3. Characterization of HHU-COF-1 (larger scale) and HHU-COF-2 (larger scale)

### 3.1. Infrared (IR) spectroscopy

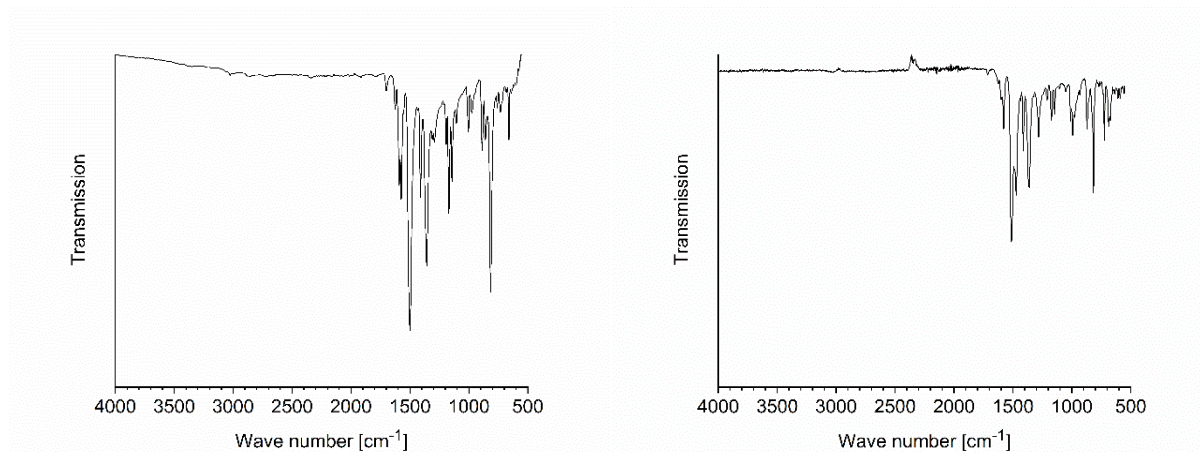

**Figure S18.** IR-spectra of HHU-COF-1 (larger scale; left) and HHU-COF-2 (larger scale; right).

### 3.2. Elemental analysis

**Table S5.** Elemental analysis of HHU-COF-1 (larger scale) and HHU-COF-2 (larger scale).

|                          | C [wt%] | H [wt%] | N [wt%] | Rest [wt%] |
|--------------------------|---------|---------|---------|------------|
| HHU-COF-1 Calculated     | 81.93   | 4.42    | 13.65   | -          |
| HHU-COF-1 (larger scale) | 80.86   | 4.27    | 13.03   | 1.84       |
| HHU-COF-2 Calculated     | 60.66   | 1.82    | 10.11   | 27.41      |
| HHU-COF-2 (larger scale) | 60.23   | 1.75    | 10.01   | 28.01      |

### 3.3. N<sub>2</sub>-sorption

The nitrogen sorption isotherm of HHU-COF-1 (larger scale) is shown in Figure S19. The BET surface area was determined as 2351 m<sup>2</sup>/g and the total pore volume as 0.69 cm<sup>3</sup>/g. The pore size distribution (Figure S19) showed a maximum at a pore diameter between 25 Å and 27 Å. Three further maxima were at pore diameters of 14 Å and 18 Å

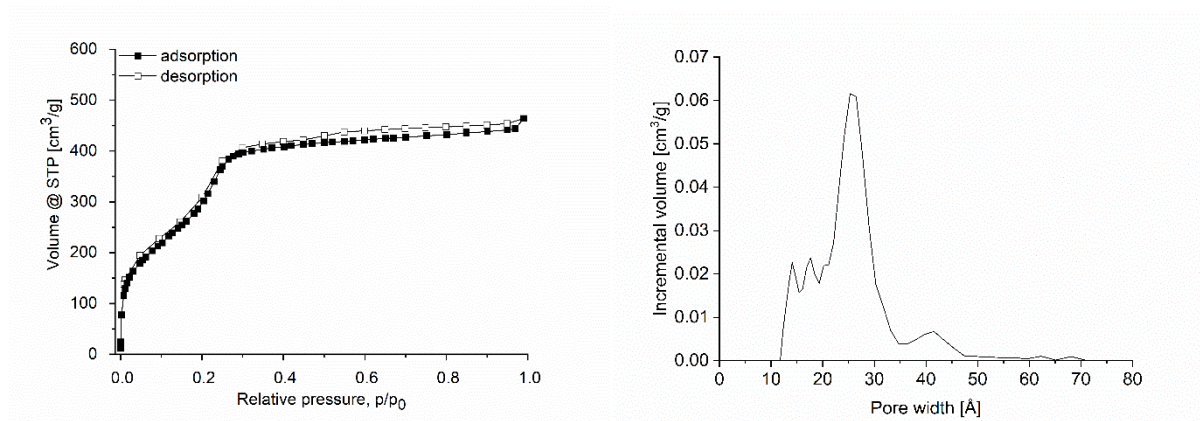

**Figure S19.** Nitrogen sorption isotherm (left) and pore size distribution calculated with slit pore, NLDFT equilibrium model (right) of HHU-COF-1 (larger scale).

The nitrogen sorption isotherm of HHU-COF-2 (larger scale) is shown in Figure S20. The BET surface area was determined as 1346 m<sup>2</sup>/g and the total pore volume as 0.68 cm<sup>3</sup>/g. The pore size distribution (Figure S20) mainly revealed pore diameters between 10 to 30 Å. In addition, a minor contribution of pores up to 200 Å in diameter was observed.

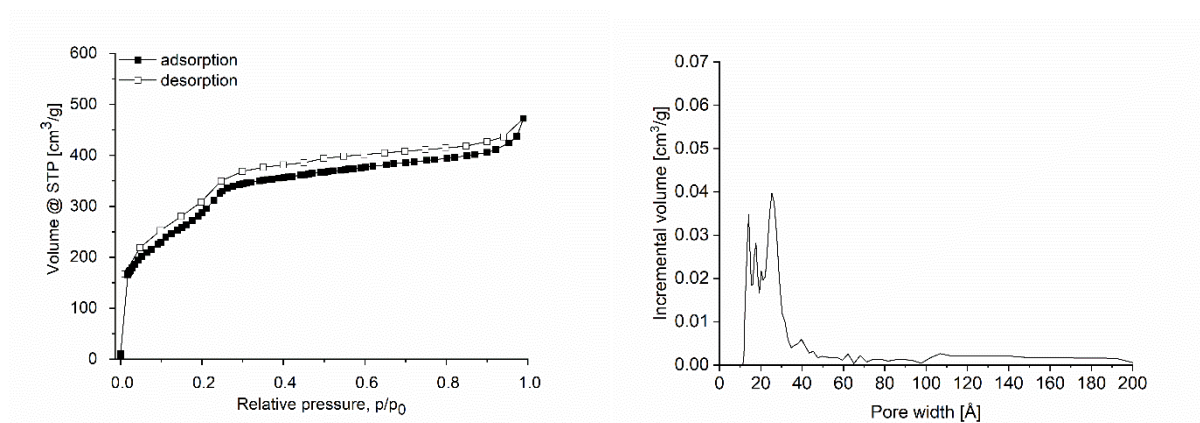

**Figure S20.** Nitrogen sorption isotherm (left) and pore size distribution calculated with slit pore, NLDFT equilibrium model (right) of HHU-COF-2 (larger scale).



### 3.4. TGA

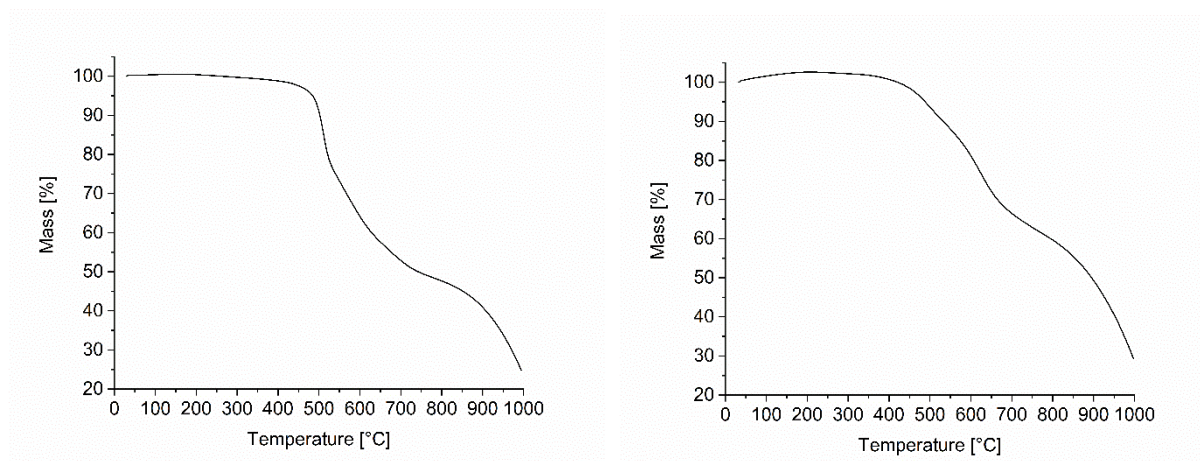

**Figure S21.** TGA curves of HHU-COF-1 (larger scale; left) and HHU-COF-2 (larger scale; right). Acquired under nitrogen atmosphere with a heating rate of 5 K/min.

### 3.5. Powder X-Ray diffraction (PXRD)

The PXRD of HHU-COF-1 (larger scale) (

Figure S22; left) showed, in addition to the characteristic reflex between  $2^\circ$  and  $3^\circ$   $2\theta$ , two reflexes with lower intensity at  $4^\circ$  and about  $5^\circ$   $2\theta$ . The PXRD of HHU-COF-2 (larger scale) (

Figure S22; right) exhibited a reflex between  $2^\circ$  and  $3^\circ$   $2\theta$ . Another reflex could be observed at  $5^\circ$   $2\theta$ . Both COFs showed no evidence of an amorphous character.

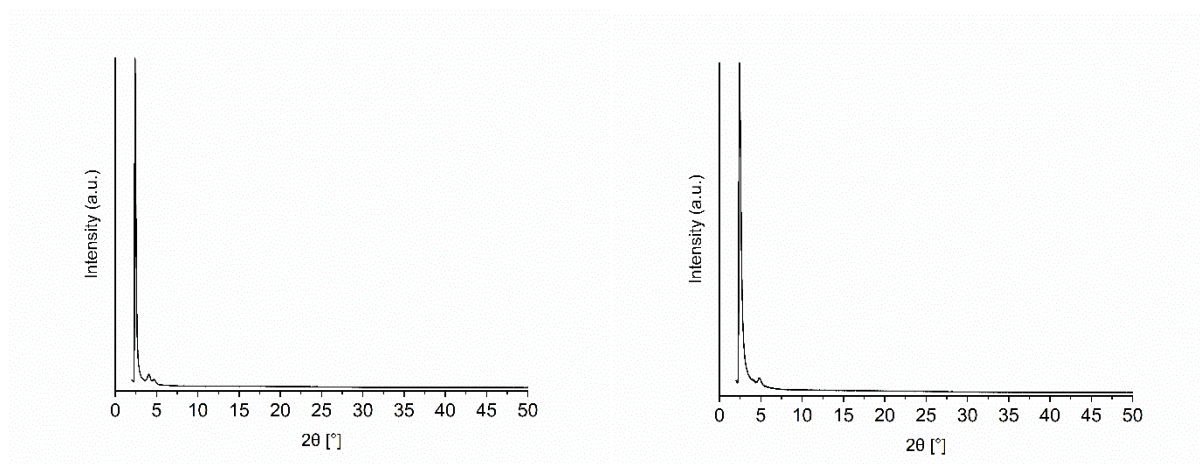

**Figure S22.** PXRD pattern of HHU-COF-1 (larger scale; left) and HHU-COF-2 (larger scale; right).

## 4. Preparation and characterization of MMMs

### 4.1. Schematic preparation of the pure polymer membrane and MMMs

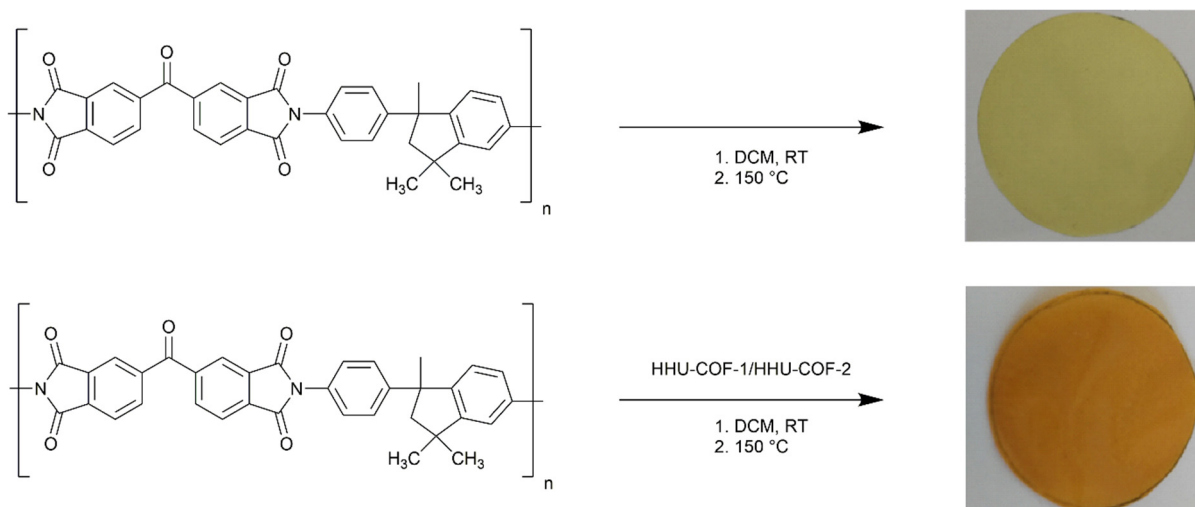

**Figure S23.** Schematic preparation of the pure Matrimid membrane (top) and MMMs, using the 16 wt% HHU-COF-2 MMM as an example (bottom).

### 4.2. Casting procedure

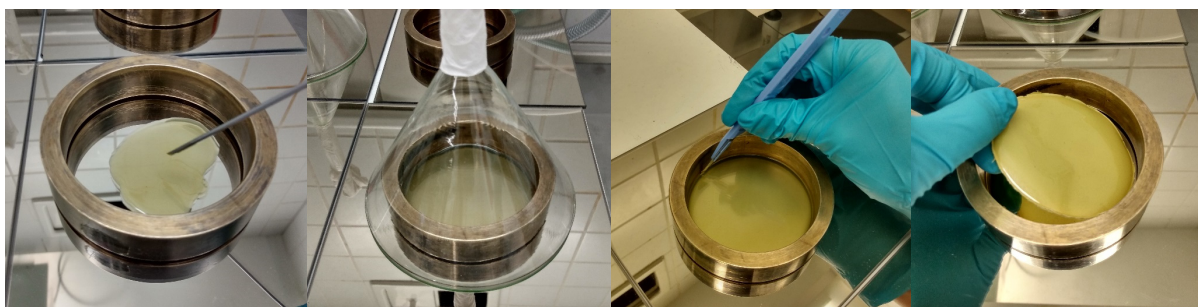

**Figure S24.** Preparation of membranes by solution casting (from left to right): casting the solution, drying, cutting with a scalpel and removing the membrane.

### 4.3. Set-up for CO<sub>2</sub>/CH<sub>4</sub> mixed gas separation measurements

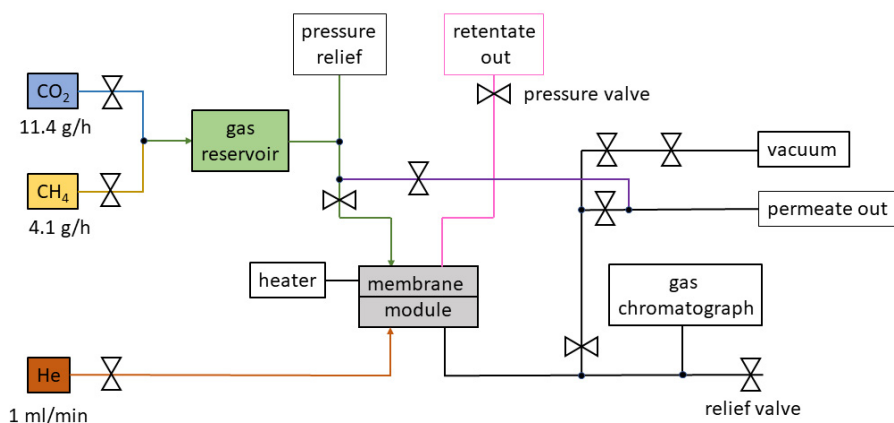

**Figure S25.** Set-up for CO<sub>2</sub>/CH<sub>4</sub> mixed gas separation measurements [7].

### 4.4. Membrane thickness

**Table S6.** Average thickness of MMMs.

| COF content<br>[wt%] | HHU-COF-1/<br>Matrimid              | HHU-COF-2/<br>Matrimid |
|----------------------|-------------------------------------|------------------------|
|                      | Average thickness [ $\mu\text{m}$ ] |                        |
| 8                    | 74.9                                | 74.6                   |
| 16                   | 72.4                                | 68.6                   |
| 24                   | 73.0                                | 73.0                   |



#### 4.5. SEM images of membrane surfaces

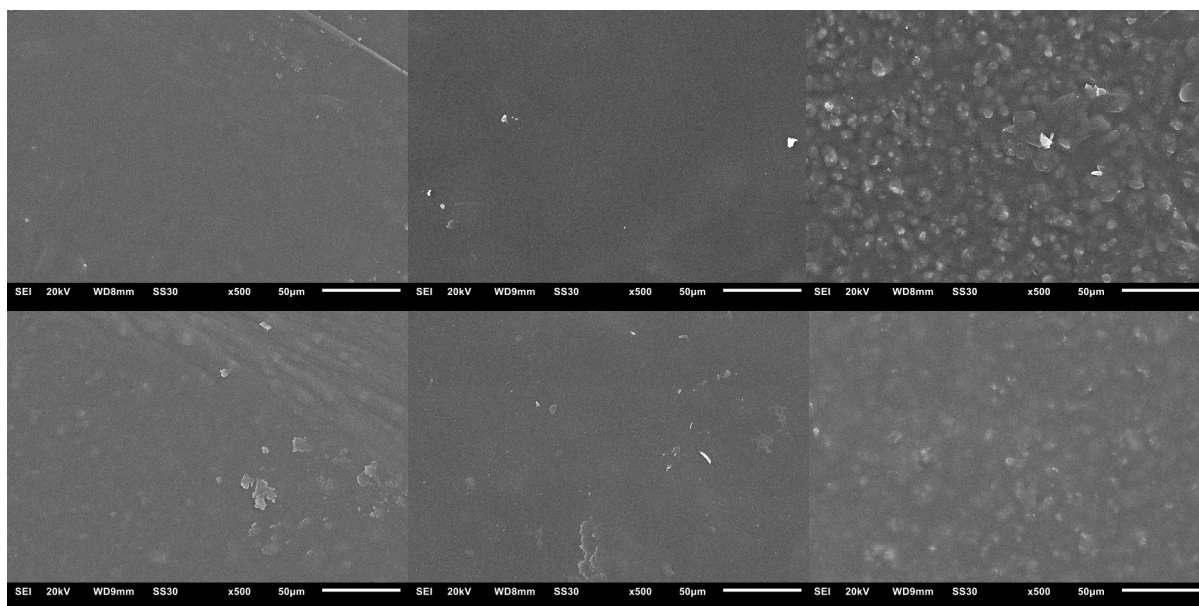

**Figure S26.** Top-surface SEM images of HHU-COF-1/Matrimid (top) with 8 wt% (left), 16 wt% (middle) and 24 wt% filler (right) and HHU-COF-2/Matrimid MMMs (bottom) with 8 wt% (left), 16 wt% (middle) and 24 wt% filler (right).

#### 4.6. SEM-EDX of HHU-COF-2/Matrimid MMMs

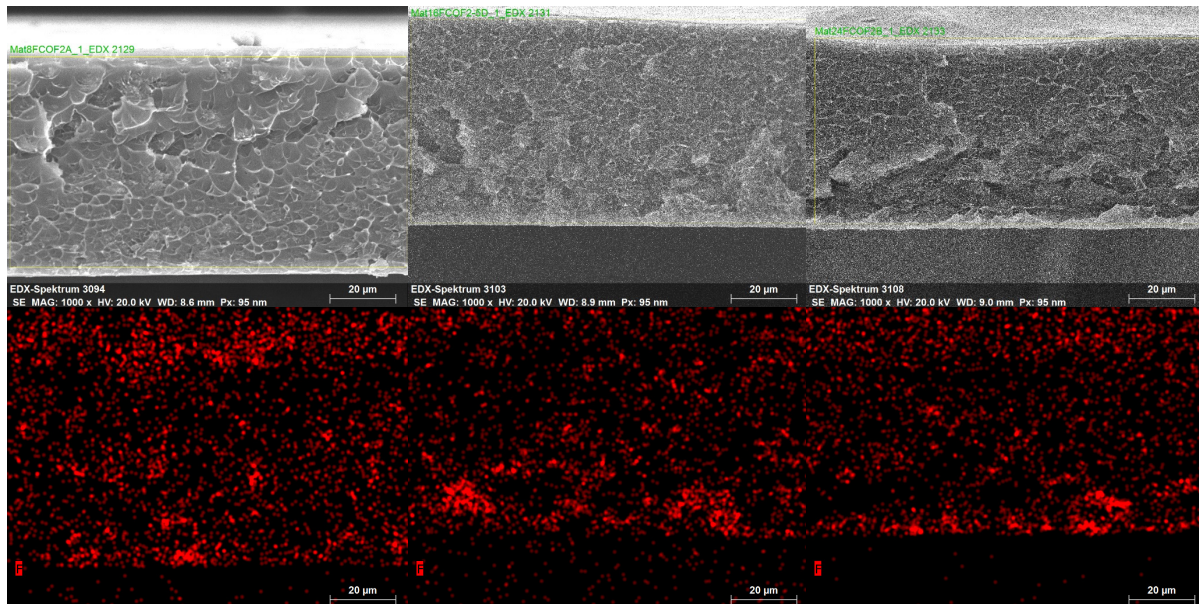

**Figure S27.** SEM images of HHU-COF-2/Matrimid MMMs (top) with 8 wt% (left), 16 wt% (middle) and 24 wt% filler (right) and associated fluorine elemental mapping (bottom).

#### 4.7. Tensile strength

**Table S7.** Tensile strength of pure Matrimid and MMMs.

| Filler material        | -  | HHU-COF-1 |    |    | HHU-COF-2 |    |    |
|------------------------|----|-----------|----|----|-----------|----|----|
| Filler content [wt%]   | -  | 8         | 16 | 24 | 8         | 16 | 24 |
| Tensile strength [MPa] | 91 | 74        | 79 | 51 | 76        | 75 | 59 |

#### 4.8. Long-term stability of MMMs

**Table S8.** Gas permeabilities ( $P$ ) and mixed-gas selectivity factors ( $\alpha$ ) for COF/Matrimid MMMs when stored for one year under ambient conditions.

| Filler material | Filler content [wt%] | P CO <sub>2</sub> [Barrer] | P CH <sub>4</sub> [Barrer] | $\alpha$ CO <sub>2</sub> /CH <sub>4</sub> |
|-----------------|----------------------|----------------------------|----------------------------|-------------------------------------------|
| HHU-COF-1       | 8                    | 8.6 ± 1.1                  | 0.19 ± 0.03                | 44 ± 2                                    |
|                 | 16                   | 8.0 ± 0.4                  | 0.17 ± 0.01                | 46 ± 2                                    |
|                 | 24                   | 5.8*                       | 0.20*                      | 28*                                       |
| HHU-COF-2       | 8                    | 7.1 ± 0.1                  | 0.16 ± 0.01                | 45 ± 1                                    |
|                 | 16                   | 10.5 ± 0.2                 | 0.24 ± 0.01                | 44 ± 1                                    |
|                 | 24                   | 12.9 ± 0.7                 | 0.29 ± 0.02                | 45 ± 1                                    |

\*Only one measurement due to breaking of the second MMM

## 4.9. Comparison of membrane performance

**Table S9.** Comparison of CO<sub>2</sub> permeability and CO<sub>2</sub>/CH<sub>4</sub> selectivity for COFs/CTFs as porous filler materials in different polymer MMMs.

| Filler              | Filler content [wt%] | Matrix             | $P$ CO <sub>2</sub> [Barrer] | $P$ CO <sub>2</sub> elevation [%] | $S/\alpha$ CO <sub>2</sub> /CH <sub>4</sub> | Ref.      |
|---------------------|----------------------|--------------------|------------------------------|-----------------------------------|---------------------------------------------|-----------|
| -                   | -                    | Matrimid           | $6.8 \pm 0.3$                | -                                 | $42 \pm 1$                                  | This work |
| HHU-COF-1           | 8                    | Matrimid           | $9.1 \pm 0.2$                | 34                                | $46 \pm 2$                                  |           |
|                     | 16                   |                    | $9.1 \pm 1.0$                | 34                                | $46 \pm 1$                                  |           |
|                     | 24                   |                    | $5.8 \pm 0.7$                | -                                 | $41 \pm 1$                                  |           |
| HHU-COF-2           | 8                    | Matrimid           | $7.1 \pm 0.3$                | 4                                 | $51 \pm 1$                                  |           |
|                     | 16                   |                    | $10.2 \pm 0.3$               | 50                                | $44 \pm 2$                                  |           |
|                     | 24                   |                    | $13.0 \pm 1.0$               | 91                                | $40 \pm 1$                                  |           |
| -                   | -                    | Matrimid           | $6.8 \pm 0.1^a$              | -                                 | $30.5 \pm 0.6^a$                            | [8]       |
| ACOF-1 <sup>1</sup> | 8                    | Matrimid           | $9.6 \pm 1.0^a$              | 41                                | $31.9 \pm 0.8^a$                            |           |
|                     | 16                   |                    | $15.3 \pm 0.7^a$             | 125                               | $32.4 \pm 1.8^a$                            |           |
| -                   | -                    | 6FDA-DAM           | $767 \pm 24^b$               | -                                 | $22.3 \pm 2.1^b$                            | [9]       |
| COF-300             | 7                    | 6FDA-DAM           | $1185 \pm 41^b$              | 55                                | $30.3 \pm 1.5^b$                            |           |
|                     | 10                   |                    | $2842 \pm 76^b$              | 271                               | $24.6 \pm 1.7^b$                            |           |
| -                   | -                    | Pebax              | $73 \pm 4^b$                 | -                                 | $18.7 \pm 1.2^b$                            |           |
| COF-300             | 10                   | Pebax              | $107 \pm 6^b$                | 47                                | $25.5 \pm 1.3^b$                            | [10]      |
| -                   | -                    | Pebax              | $53^c$                       | -                                 | $17^c$                                      |           |
| CTPP <sup>2</sup>   | 0.025                | Pebax              | $73^c$                       | 38                                | $25^c$                                      |           |
| -                   | -                    | PIM-1 <sup>4</sup> | $3672^d$                     | -                                 | $10.6^d$                                    | [11]      |
| SNW-1 <sup>3</sup>  | 10                   | PIM-1 <sup>4</sup> | $7553^d$                     | 106                               | $13.5^d$                                    |           |
| -                   | -                    | PIM-1 <sup>4</sup> | $5800^e$                     | -                                 | $11.5^e$                                    | [12]      |
| FCTF-1              | 2                    | PIM-1 <sup>4</sup> | $7300^e$                     | 26                                | $16.6^e$                                    |           |
|                     | 5                    |                    | $9400^e$                     | 62                                | $14.8^e$                                    |           |
| -                   | -                    | Matrimid           | $6.8 \pm 0.3^f$              | -                                 | $42 \pm 1^f$                                | [13]      |
| CTF-bi-phenyl       | 8                    | Matrimid           | $12.0 \pm 0.2^f$             | 76                                | $43 \pm 1^f$                                |           |
|                     | 16                   |                    | $15.1 \pm 0.2^f$             | 122                               | $44 \pm 1^f$                                |           |
|                     | 24                   |                    | $15.4 \pm 0.5^f$             | 126                               | $44 \pm 1^f$                                |           |
| -                   | -                    | Matrimid           | $6.8 \pm 0.3^f$              | -                                 | $42 \pm 1^f$                                | [7]       |
| CTF-fluorene        | 8                    | Matrimid           | $9.2 \pm 0.4^f$              | 35                                | $43 \pm 1^f$                                |           |
|                     | 16                   |                    | $12.6 \pm 0.1^f$             | 85                                | $45 \pm 1^f$                                |           |
|                     | 24                   |                    | $17.8 \pm 0.3^f$             | 162                               | $44 \pm 2^f$                                |           |

<sup>a</sup>Mixed gas; 308 K; feed pressure 4 bar; <sup>b</sup>Mixed gas; 298 K; transmembrane pressure 1 bar; <sup>c</sup>Single gas; 293 K; feed pressure 4 bar; <sup>d</sup>Single gas; 303 K; feed pressure 2 bar; <sup>e</sup>Single gas; 303 K; feed pressure 1 atm; <sup>f</sup>Mixed gas; 298 K; feed pressure 4 bar; <sup>1</sup>azine-linked covalent organic framework; <sup>2</sup>porous covalent triazine piperazine polymer; <sup>3</sup>Schiff base network; <sup>4</sup>polymer of intrinsic microporosity

## 5. Synthesis and characterization of TRITER-1 (= SCF-HCOF-1) and SCF-FCOF-1

### 5.1. Materials and Synthesis

Terephthalaldehyde (TA; 99%) was obtained from Sigma-Aldrich, 2,3,5,6-tetrafluoroterephthalaldehyde (TFTA; 98%) from BLDpharm and 1,3,5-tris-(4-aminophenyl)triazine (TAPT; > 98%) from TCI.

#### *Synthesis of TRITER-1 (= SCF-HCOF-1)*

TRITER-1 was synthesized in analogy to the literature [14]: 53.6 mg terephthalaldehyde (TA; 0.400 mmol), 94.4 mg TAPT (0.267 mmol) and 1 mL of the solvent mixture of 1,4-dioxane and mesitylene (1:1, v/v) were placed in a glass ampoule, followed by an ultra-sonification treatment for 15 min in order to ensure sufficient mixing of the educts. The mixture was degassed by applying three freeze-pump-thaw cycles and the ampoule was flame sealed under vacuum. After heating at 120 °C for three days, the crude product was washed with THF followed by Soxhlet extraction for 24 h each in THF and in ethanol to remove unreacted monomers. Drying was performed with supercritical CO<sub>2</sub>. (yield: 113.0 mg; 84.4%).

#### *Synthesis of SCF-FCOF-1*

SCF-FCOF-1 was synthesized in analogy to the literature [14]: 82.4 mg 2,3,5,6-tetrafluoroterephthalaldehyde (TFTA; 0.400 mmol), 94.4 mg TAPT (0.267 mmol) and 1 mL of the solvent mixture of 1,4-dioxane and mesitylene (1:1, v/v) were placed in a glass ampoule, followed by an ultra-sonification treatment for 30 min in order to ensure sufficient mixing of the educts. The mixture was degassed by applying three freeze-pump-thaw cycles and the ampoule was flame sealed under vacuum. After heating at 120 °C for three days, the crude product was washed with THF followed by Soxhlet extraction for 24 h each in THF and in ethanol to remove unreacted monomers. Drying was performed with supercritical CO<sub>2</sub>. (yield: 121.7 mg; 74.8%)

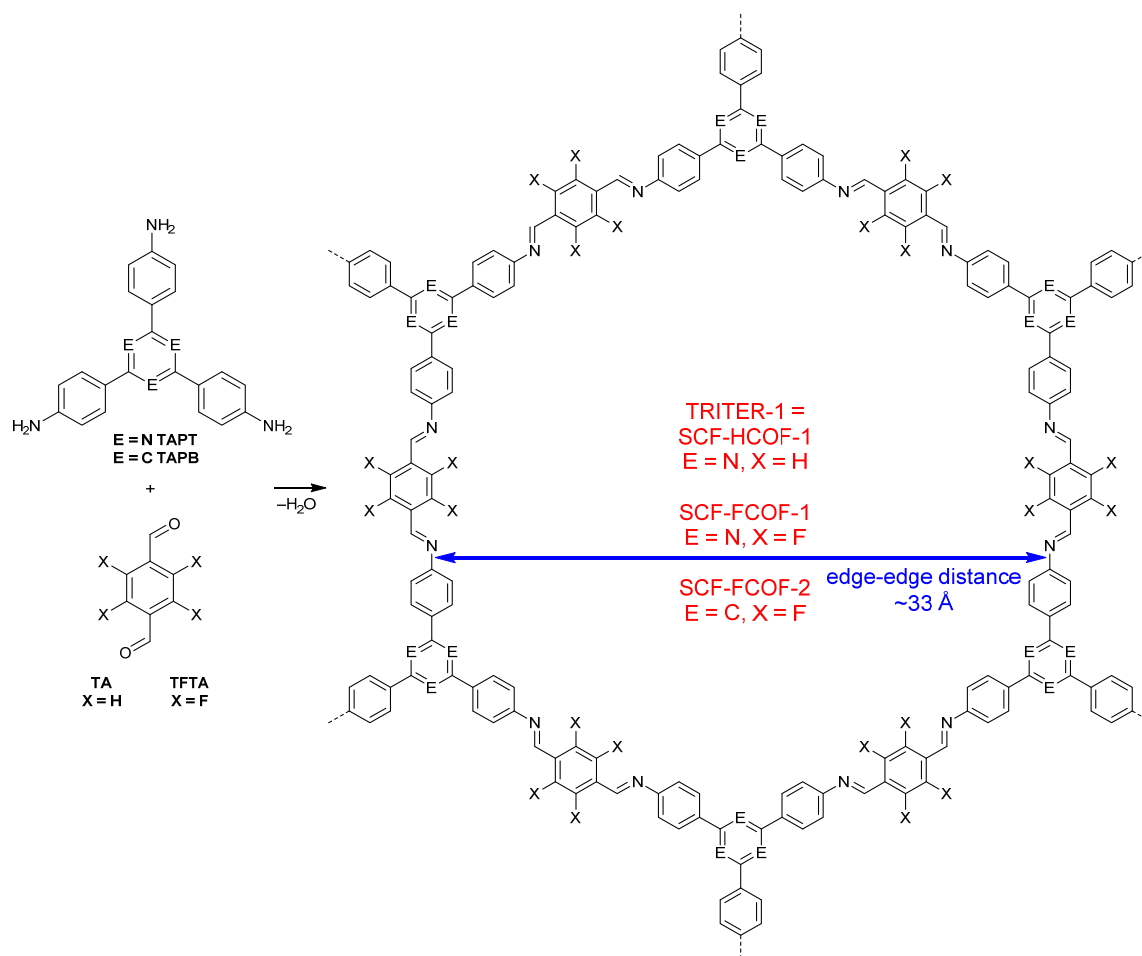

**Scheme S1.** Schematic formation of TRITER-1 (= SCF-HCOF-1) and SCF-FCOF-1 from TAPT and TA or TFTA, respectively [14,15]. (TAPB = 1,3,5-tris(4-aminophenyl) benzene, TAPT = 2,4,6-tris(4-aminophenyl)-1,3,5-triazine, TA = terephthalaldehyde, TFTA = 2,3,5,6-tetrafluoroterephthalaldehyde). The edge-edge distance was taken from the literature of SCF-FCOF-1 and -2 [14].



## 5.2. IR spectroscopy

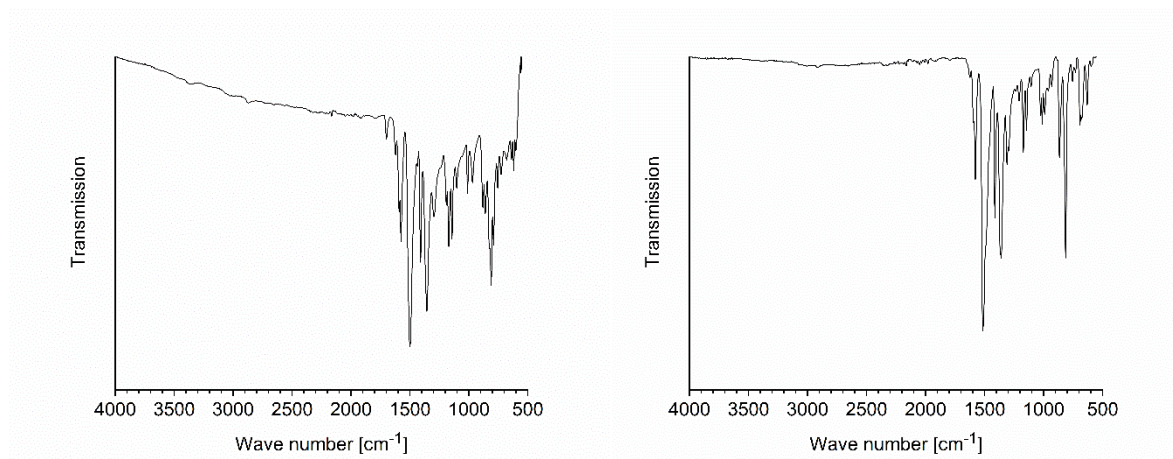

**Figure S28.** IR-spectra of TRITER-1 (left) and SCF-FCOF-1 (right).

## 5.3. Elemental analysis

**Table S10.** Elemental analysis of TRITER-1 and SCF-FCOF-1.

|                       | C [wt%] | H [wt%] | N [wt%] | Rest [wt%] |
|-----------------------|---------|---------|---------|------------|
| TRITER-1 Calculated   | 79.04   | 4.19    | 16.77   | -          |
| TRITER-1              | 77.52   | 4.02    | 16.29   | 2.17       |
| SCF-FCOF-1 Calculated | 65.03   | 2.48    | 13.79   | 18.70      |
| SCF-FCOF-1            | 65.19   | 2.67    | 13.64   | 18.50      |

## 5.4. SEM-EDX

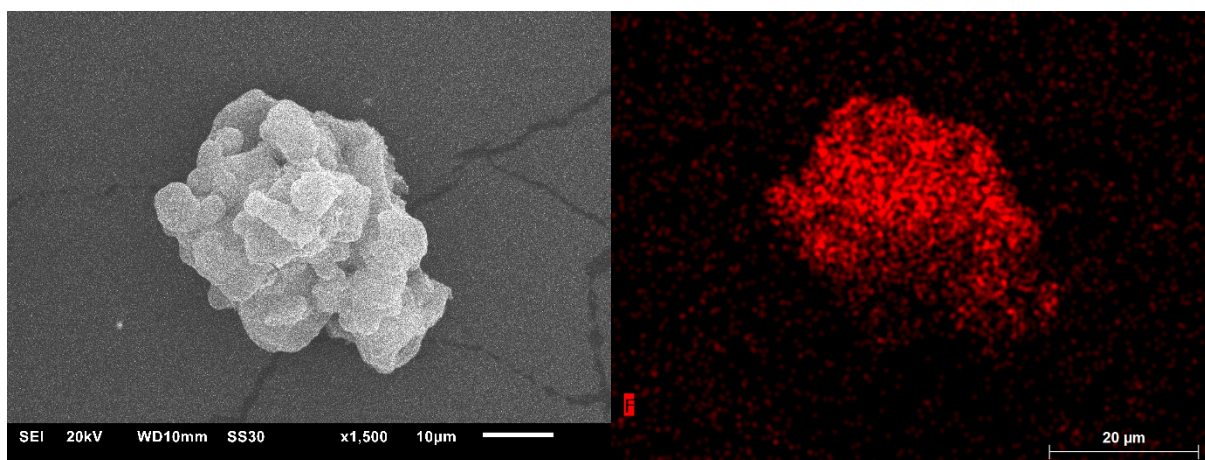

**Figure S29.** SEM image (left) of SCF-FCOF-1 and associated fluorine elemental mapping (right)

**Table S11.** EDX analysis of SCF-FCOF-1.

|                                   | C     | H    | F     | N     | O   | Au  | Si  | Al  | Sum  |
|-----------------------------------|-------|------|-------|-------|-----|-----|-----|-----|------|
| Ideal [wt%]                       | 65.03 | 2.48 | 18.70 | 13.79 | -   | -   | -   | -   | 100  |
| EDX [wt%]                         | 47.9  | -    | 9.5   | 6.7   | 0.9 | 8.6 | 0.2 | 0.1 | 73.9 |
| EDX [wt%] without Au              | 47.9  | -    | 9.5   | 6.7   | 0.9 | -   | 0.2 | 0.1 | 65.3 |
| EDX [wt%] <sup>a</sup> without Au | 73.4  | -    | 14.5  | 10.3  | 1.4 | -   | 0.3 | 0.2 | 100  |

<sup>a</sup> normalized

## 5.5. N<sub>2</sub>-sorption

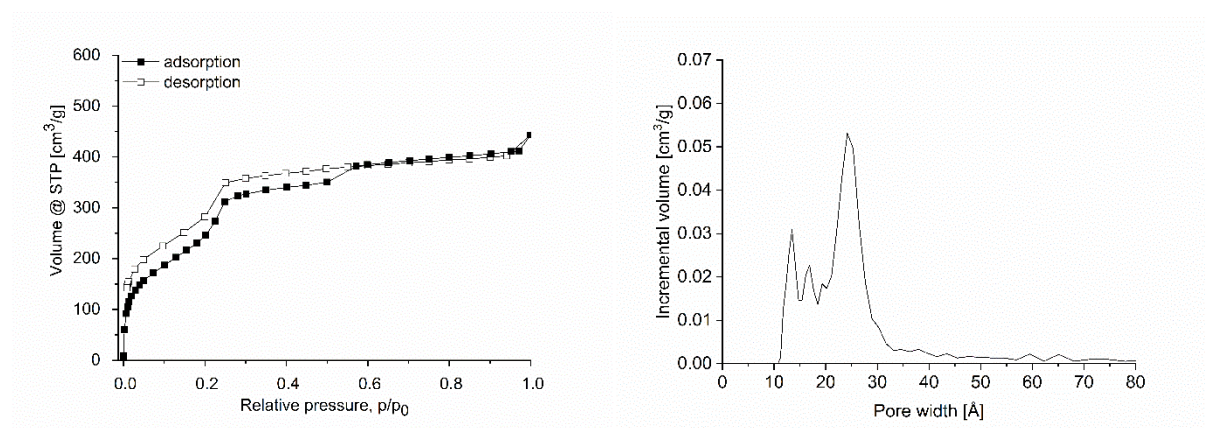**Figure S30.** Nitrogen sorption isotherm (left) and pore size distribution calculated with slit pore, NLDT equilibrium model (right) of TRITER-1.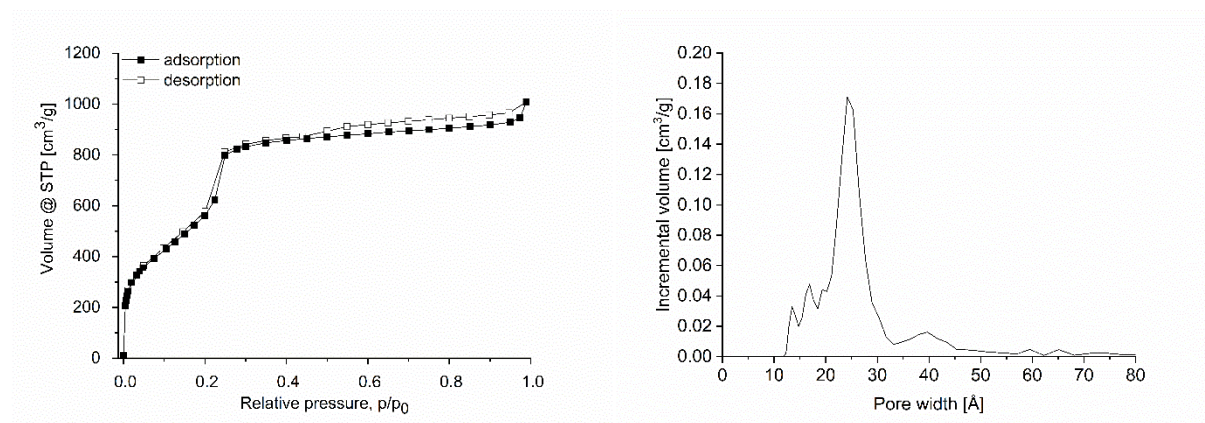**Figure S31.** Nitrogen sorption isotherm (left) and pore size distribution calculated with slit pore, NLDT equilibrium model (right) of SCF-FCOF-1.

## 5.6. TGA

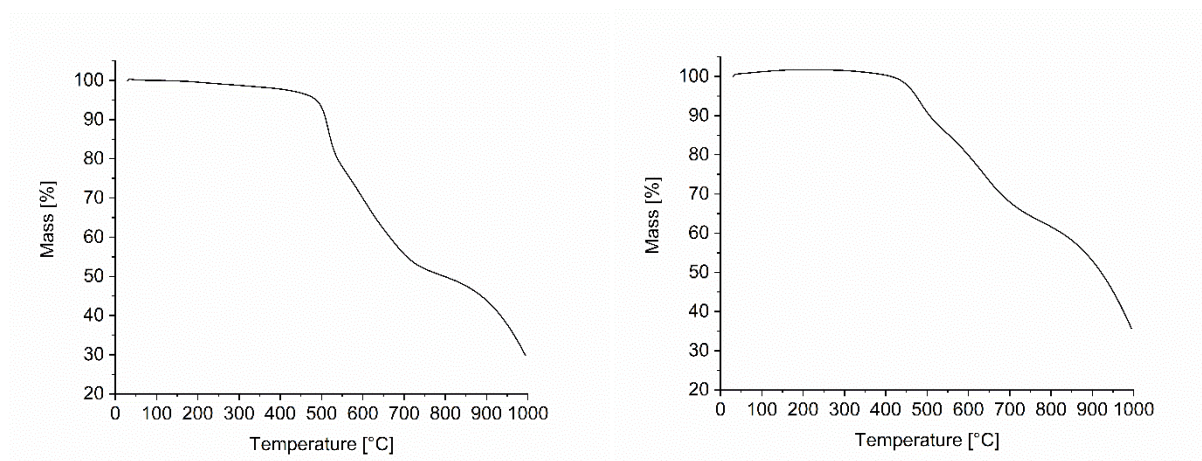

**Figure S32.** TGA curves of TRITER-1 (left) and SCF-FCOF-1 (right). Acquired under nitrogen atmosphere with a heating rate of 5 K/min.

## 5.7. PXRD

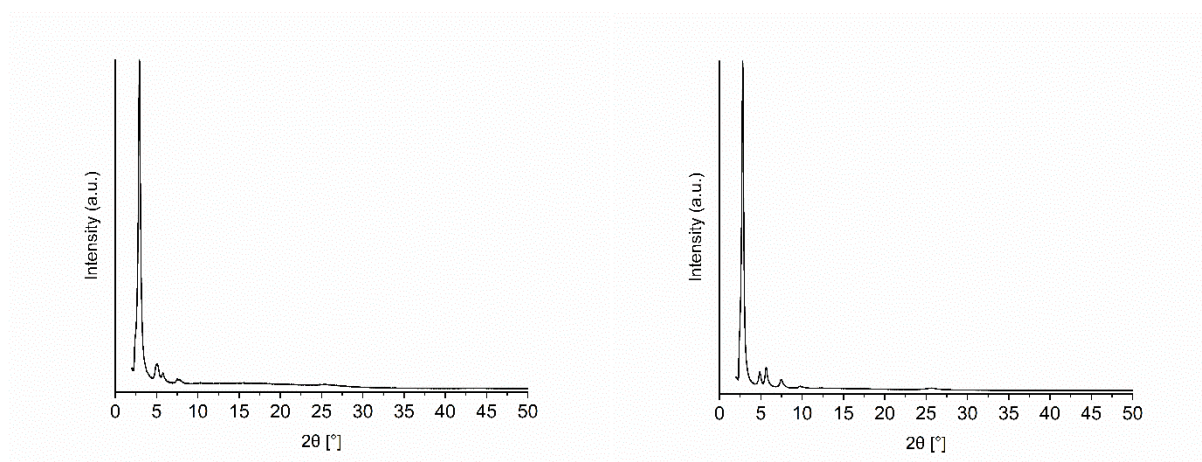

**Figure S33.** PXRD pattern of TRITER-1 (left) and SCF-FCOF-1 (right) prepared in this work.



### 5.8. Images of TRITER-1 and SCF-FCOF-1

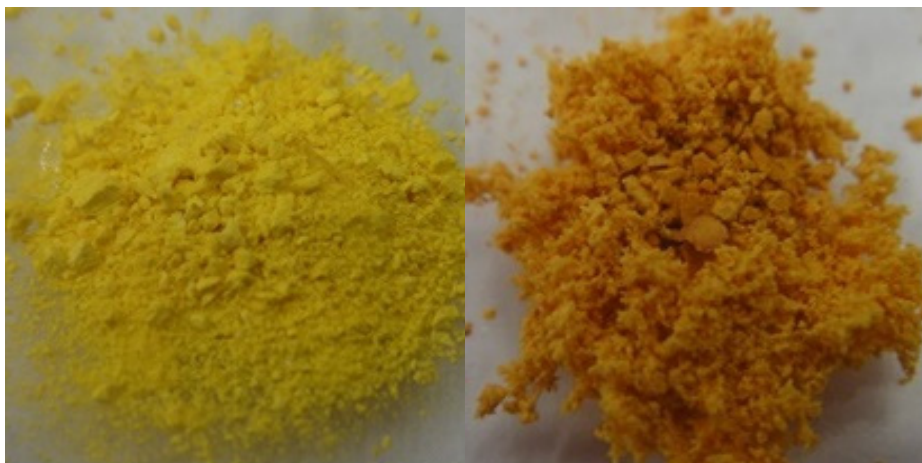

**Figure S34.** Images of TRITER-1 (left) and SCF-FCOF-1 (right).

## 6. References

1. Chen, T.-H.; Popov, I.; Zenasni, O.; Daugulis, O.; Miljanić, O. Š. Superhydrophobic perfluorinated metal–organic frameworks. *Chem. Commun.* **2013**, *49*, 6846–6848. DOI: 10.1039/C3CC41564C
2. de la Peña Ruigómez, A.; Rodríguez-San-Miguel, D.; Stylianou, K.C.; Cavallini, M.; Gentili, D.; Liscio, F.; Milita, S.; Roscioni, O.M.; Ruiz-González, M.L.; Carbonell, C.; Maspoch, D.; Mas-Ballesté, R.; Segura, J.L.; Zamora, F. Direct On-Surface Patterning of a Crystalline Laminar Covalent Organic Framework Synthesized at Room Temperature. *Chem. Eur. J.* **2015**, *21*, 10666–10670. DOI: 10.1002/chem.201501692
3. Huang, N.; Chen, X.; Krishna, R.; Jiang, D. Two-Dimensional Covalent Organic Frameworks for Carbon Dioxide Capture through Channel-Wall Functionalization. *Angew. Chem. Int. Ed.* **2015**, *54*, 2986–2990. DOI: 10.1002/anie.201411262
4. Kandambeth, S.; Shinde, D.B.; Panda, M.K.; Lukose, B.; Heine, T.; Banerjee, R. Enhancement of Chemical Stability and Crystallinity in Porphyrin-Containing Covalent Organic Frameworks by Intramolecular Hydrogen Bonds. *Angew. Chem. Int. Ed.* **2013**, *52*, 13052–13056. DOI: 10.1002/anie.201306775
5. Kaleeswaran, D.; Vishnoi, P.; Murugavel, R. [3+3] Imine and  $\beta$ -ketoenamine tethered fluorescent covalent-organic frameworks for CO<sub>2</sub> uptake and nitroaromatic sensing. *J. Mater. Chem. C* **2015**, *3*, 7159–7171. DOI: 10.1039/C5TC00670H
6. Kandambeth, S.; Mallick, A.; Lukose, B.; Mane, M.V.; Heine, T.; Banerjee, R. Construction of Crystalline 2D Covalent Organic Frameworks with Remarkable Chemical (Acid/Base) Stability via a Combined Reversible and Irreversible Route. *J. Am. Chem. Soc.* **2012**, *134*, 19524–19527. DOI: 10.1021/ja308278w
7. Bügel, S.; Spieß, A.; Janiak, C. Covalent triazine framework CTF-fluorene as porous filler material in mixed matrix membranes for CO<sub>2</sub>/CH<sub>4</sub> separation. *Micropor. Mesopor. Mat.* **2021**, *316*, 110941. DOI: 10.1016/j.micromeso.2021.110941
8. Shan, M.; Seoane, B.; Rozhko, E.; Dikhtiarenko, A.; Clet, G.; Kapteijn, F.; Gascon, J. Azine-Linked Covalent Organic Framework (COF)-Based Mixed-Matrix Membranes for CO<sub>2</sub>/CH<sub>4</sub> Separation. *Chem. Eur. J.* **2016**, *22*, 14467–14470. DOI: 10.1002/chem.201602999
9. Cheng, Y.; Zhai, L.; Ying, Y.; Wang, Y.; Liu, G.; Dong, J.; Ng, D.Z.L.; Khan, S.A.; Zhao, D. Highly efficient CO<sub>2</sub> capture by mixed matrix membranes containing three-dimensional covalent organic framework fillers. *J. Mater. Chem. A* **2019**, *7*, 4549–4560. DOI: 10.1039/C8TA10333J

10. Thankamony, R.L.; Li, X.; Das, S.K.; Ostwal, M.M.; Lai, Z. Porous covalent triazine piperazine polymer (CTPP)/PEBAX mixed matrix membranes for CO<sub>2</sub>/N<sub>2</sub> and CO<sub>2</sub>/CH<sub>4</sub> separations. *J. Membr. Sci.* **2019**, *591*, 117348. DOI: 10.1016/j.memsci.2019.117348
11. Wu, X.; Tian, Z.; Wang, S.; Peng, D.; Yang, L.; Wu, Y.; Xin, Q.; Wu, H.; Jiang, Z. Mixed matrix membranes comprising polymers of intrinsic microporosity and covalent organic framework for gas separation. *J. Membr. Sci.* **2017**, *528*, 273–283. DOI: 10.1016/j.memsci.2017.01.042
12. Jiang, H.; Zhang, J.; Huang, T.; Xue, J.; Ren, Y.; Guo, Z.; Wang, H.; Yang, L.; Yin, Y.; Jiang, Z.; Guiver, M.D. Mixed-Matrix Membranes with Covalent Triazine Framework Fillers in Polymers of Intrinsic Microporosity for CO<sub>2</sub> Separations. *Ind. Eng. Chem. Res.* **2019**, *59*, 5296–5306. DOI: 10.1021/acs.iecr.9b04632
13. Bügel, S.; Hoang, Q.-D.; Spieß, A.; Sun, Y.; Xing, S.; Janiak, C. Biphenyl-Based Covalent Triazine Framework/Matrimid® Mixed-Matrix Membranes for CO<sub>2</sub>/CH<sub>4</sub> Separation. *Membranes* **2021**, *11*, 795. DOI: 10.3390/membranes11100795
14. Liao, Q.; Ke, C.; Huang, X.; Zhang, G.; Zhang, Q.; Zhang, Z.; Zhang, Y.; Liu, Y.; Ning, F.; Xi, K. Catalyst-free and efficient fabrication of highly crystalline fluorinated covalent organic frameworks for selective guest adsorption. *J. Mater. Chem. A* **2019**, *7*, 18959–18970. DOI: 10.1039/C9TA06214A
15. Gomes, R.; Bhanja, P.; Bhaumik, A. A triazine-based covalent organic polymer for efficient CO<sub>2</sub> adsorption. *Chem. Commun.* **2015**, *51*, 10050–10053. DOI: 10.1039/C5CC02147B
